# Supplementary material for: Multi-stimuli-responsive supramolecular gel constructed by pillar[5]arene-based pseudorotaxanes for efficient detection and separation of multi-analytes in aqueous solution
Source: Royal Society of Chemistry journal article supplement (doi:10.1039/c8sm01838c), 2018-01-01
Supplement: c8sm01838c1.pdf [file c8sm01838c1.pdf]

*Electronic Supplementary Information*

**Multi-stimuli-responsive supramolecular gel constructed by  
pillar[5]arene-based pseudorotaxanes for efficient detection  
and separation of multi-analytes in water solution**

You-Ming Zhang\* Yong-Fu Li, Hu Fang, Jun-Xia He, Bi-Rong Yong, Hong Yao, Tai-Bao Wei and Qi Lin\*

*Key Laboratory of Eco-Environment-Related Polymer Materials, Ministry of Education of China, Key Laboratory of Polymer Materials of Gansu Province, College of Chemistry and Chemical Engineering, Northwest Normal University, Lanzhou, Gansu, 730070, P. R. China.*

## Table of Contents

### Materials and methods

**Scheme S1** Synthesis of compound **PN** and **WP5**.

**Fig. S1**  $^1\text{H}$  NMR spectrum of **BD** in  $\text{DMSO-}d_6$ .

**Fig. S2**  $^{13}\text{C}$  NMR spectra (151 MHz,  $\text{DMSO-}d_6$ ) of **BD**.

**Fig. S3** ESI-MS spectrum of **BD**.

**Fig. S4**  $^1\text{H}$  NMR spectrum of compound **ZN** in  $\text{CDCl}_3$ .

**Fig. S5**  $^{13}\text{C}$  NMR spectrum of compound **ZN** in  $\text{CDCl}_3$ .

**Fig. S6** ESI-MS spectrum of compound **ZN**.

**Fig. S7**  $^1\text{H}$  NMR spectra (600 MHz,  $\text{DMSO-}d_6$ ) of **PN**.

**Fig. S8**  $^{13}\text{C}$  NMR spectra (151 MHz,  $\text{DMSO-}d_6$ ) of **PN**.

**Fig. S9** ESI-MS spectrum of **PN**.

**Fig. S10**  $^1\text{H}$  NMR spectra (600 MHz,  $\text{CDCl}_3$ ) of **ZM**.

**Fig. S11**  $^{13}\text{C}$  NMR spectra (151 MHz,  $\text{CDCl}_3$ ) of **ZM**.

**Fig. S12** ESI-MS spectrum of **ZM**.

**Fig. S13**  $^1\text{H}$  NMR spectra (600 MHz,  $\text{CDCl}_3$ ) of **CP5**.

**Fig. S14**  $^{13}\text{C}$  NMR spectra (151 MHz,  $\text{CDCl}_3$ ) of compound **CP5**.

**Fig. 15** High resolution mass data of compound **CP5**.

**Fig. S16**  $^1\text{H}$  NMR spectra (400 MHz,  $\text{DMSO-}d_6$ ) of **WP5**.

**Fig. S17**  $^{13}\text{C}$  NMR spectra (151 MHz,  $\text{DMSO-}d_6$ ) of **WP5**.

**Fig. S18** High resolution mass data of **WP5**.

**Table S1.** Gelation Property of supramolecular gel **WP5-PN-G**.

**Table S2.** Optimum water content of gelation conditions.

**Fig. S19** Fluorescence spectra of supramolecular gel **WP5-PN-G** (in gelled state, 10.5 %, w/v) and solution in the DMSO-H<sub>2</sub>O (1:1, v/v) system ( $\lambda_{\text{ex}} = 365$  nm).

**Fig. S20** Fluorescence spectra of **WP5** ( $c = 90$  mM), **PN** ( $c = 87$  mM), **WP5-PN** sol ( $c = 90$  mM,  $T = 85$  °C >  $T_{\text{gel}}$ ) and the **WP5-PN-G** (in the DMSO-H<sub>2</sub>O (1:1, v/v) system,  $c = 90$  mM,  $T = 20$  °C <  $T_{\text{gel}}$ ,  $\lambda_{\text{ex}} = 365$  nm).

**Fig. S21** Partial <sup>1</sup>H NMR spectra of **WP5** (0.017 mol/L) in DMSO-*d*<sub>6</sub> with increasing amounts of **PN**, (a) Free **WP5**; (b) 0.5 equiv. (c) 2.0 equiv. (d) Free **PN**.

**Fig. S22** 2D NOESY NMR spectrum (600 MHz, 298 K) of 50.0 mM **WP5** and **PN** in DMSO-*d*<sub>6</sub> solution.

**Fig. S23** ESI-MS spectrum of the host-guest complex formed between **WP5** and **PN**.

**Fig. S24** <sup>1</sup>H NMR spectra (600 MHz, 298 K) of **WP5-PN** in DMSO-*d*<sub>6</sub> at various concentrations: (a) 1.0 mM; (b) 2.0 mM; (c) 5.0 mM; (d) 10.0 mM; (e) 20.0 mM.

**Fig. S25** XRD diagrams of xerogel of **WP5-PN-G**, metallogel of **WP5-PN-FeG**, xerogel of **WP5-PN-FeG + F<sup>-</sup>**.

**Fig. S26** XRD diagrams of xerogel of **WP5-PN-G**, metallogel of **WP5-PN-CuG** and xerogel of **WP5-PN-CuG + CN<sup>-</sup>**.

**Fig. S27** Partial <sup>1</sup>H NMR spectra (600 MHz, DMSO-*d*<sub>6</sub>, 298 K) of **WP5-**

**PN** and  $\text{CH}_3\text{COOH}$  at various concentrations: (a) 5.0 mM; (b) 8.0 mM; (c) 10.0 mM; (d) 15.0 mM; (e) 20.0 mM.

**Fig. S28** Photographs of organogel of **WP5-PN-G** (10.5% w/v) in DMSO- $\text{H}_2\text{O}$  (1:1, v/v) system and organogels of **WP5-PN-G** in the presence of various metal ions ( $\text{Zn}^{2+}$ ,  $\text{Pb}^{2+}$ ,  $\text{Cd}^{2+}$ ,  $\text{Al}^{3+}$ ,  $\text{Cr}^{3+}$ ,  $\text{Ni}^{2+}$ ,  $\text{Co}^{2+}$ ,  $\text{Cu}^{2+}$ ,  $\text{Hg}^{2+}$ ,  $\text{Fe}^{3+}$ ,  $\text{Ba}^{2+}$ ,  $\text{Ag}^+$ ,  $\text{Mg}^{2+}$ ,  $\text{Ca}^{2+}$ ,  $\text{Tb}^{3+}$ ,  $\text{La}^{3+}$  and  $\text{Eu}^{3+}$ ) under UV light.

**Fig. S29** Fluorescence spectra of supramolecular gel (a) **WP5-PN-G** and **WP5-PN-FeG** (10.5%, in DMSO- $\text{H}_2\text{O}$  (v:v = 1:1) binary solution, **WP5-PN** = 1:1). (b) The fluorescence spectra of **WP5-PN-G** (10.5%, in DMSO- $\text{H}_2\text{O}$  (v:v = 1:1) binary solution, **WP5-PN** = 1:1) with increasing concentration of  $\text{Fe}^{3+}$  (using  $0.1 \text{ mol L}^{-1} \text{ Fe}^{3+}$  water solution as the  $\text{Fe}^{3+}$  sources),  $\lambda_{\text{ex}} = 365 \text{ nm}$ .

**Fig. S30** Plot of the intensity at 492 nm for a mixture of **WP5-PN-G** and  $\text{Fe}^{3+}$  ( $\lambda_{\text{ex}} = 365 \text{ nm}$ ).

**Fig. S31** Plot of the intensity at 492 nm for a mixture of **WP5-PN-G** and  $\text{Cu}^{2+}$  in DMSO- $\text{H}_2\text{O}$  (1:1, v/v) solution ( $\lambda_{\text{ex}} = 365 \text{ nm}$ ).

**Table S3.** A part of the literatures about the LOD (mol/L) of cations and anions ( $\text{Fe}^{3+}$ ,  $\text{Cu}^{2+}$ ,  $\text{F}^-$  and  $\text{CN}^-$ ) were provided in the followed table.

**Table S4** Adsorption percentage of **WP5-PN-G** for  $\text{Fe}^{3+}$  and  $\text{Cu}^{2+}$ .

**Fig. S32** (a) Photographs of **WP5-PN-CuG** in the DMSO- $\text{H}_2\text{O}$  (1:1, v/v) system (10.5 %, w/v) and **WP5-PN-CuG** in the presence of various

anions under UV light. (b) Fluorescence spectra of **WP5-PN-CuG** and **WP5-PN-CuG** (in gelled state) in the presence of various anions, ( $\lambda_{\text{ex}} = 365$  nm).

**Fig. S33** Fluorescence spectra of supramolecular metallogel **WP5-PN-CuG** (10.5%, w/v) in DMSO-H<sub>2</sub>O (1:1, v/v) solution with increasing concentration of CN<sup>-</sup> (using 1.0 M NaCN water solution as the CN<sup>-</sup> source),  $\lambda_{\text{ex}} = 365$  nm.

**Fig. S34** FT-IR spectra of xerogel of **WP5-PN-G**, metallogel **WP5-PN-FeG** and **WP5-PN-FeG + F<sup>-</sup>**.

**Fig. S35** FT-IR spectra of xerogel of **WP5-PN-G**, metallogel **WP5-PN-CuG** and **WP5-PN-CuG + CN<sup>-</sup>**.

**Fig. S36** ESI-MS spectrum of **WP5-PN-Fe<sup>3+</sup>**.

**Fig. S37** ESI-MS spectrum of **WP5-PN-Cu<sup>2+</sup>**.

**Fig. S38** Absorbance spectra of **WP5-PN-G** ( $2.0 \times 10^{-5}$  M) in DMSO-H<sub>2</sub>O (1:1, v/v) solution upon the addition of Fe<sup>3+</sup> (5.0 equiv.) and F<sup>-</sup> (20.0 equiv.). Inset: photograph showing the change in color of the solution of **WP5-PN-G** in DMSO-H<sub>2</sub>O (1:1, v/v) solution after addition of Fe<sup>3+</sup> and F<sup>-</sup> at room temperature.

**Fig. S39** Partial <sup>1</sup>H NMR spectra (600 MHz, DMSO-*d*<sub>6</sub>, 298 K) of (a) **WP5-PN** in the presence of varying amounts of Cu<sup>2+</sup> and (b) **WP5-PN + Cu<sup>2+</sup>** in the presence of varying amounts of CN<sup>-</sup>.

**Fig. S40** Emission spectra showing the reversible evidence between

**WP5-PN-G** and  $\text{Fe}^{3+}$  by introduction of  $\text{F}^-$  ( $\lambda_{\text{ex}} = 365 \text{ nm}$ ).

**Fig. S41** Fluorescent ‘‘Off–On–Off’’ cycles of **WP5-PN-G** controlled by the alternating addition of  $\text{Cu}^{2+}$  and  $\text{CN}^-$  ( $\lambda_{\text{ex}} = 365 \text{ nm}$ ).

**Fig. S42** (a) Recyclable separation of  $\text{Fe}^{3+}$  ( $\lambda_{\text{ex}} = 365 \text{ nm}$ ), (b) Recyclable separation of  $\text{Cu}^{2+}$  ( $\lambda_{\text{ex}} = 365 \text{ nm}$ ).

**Materials and physical methods**

All anions were used as tetrabutylammonium salts, which were purchased from Alfa Aesar and used as received. All metal ions were prepared from the perchlorate salts. Other reagents used in the study were of analytical grade. Fresh double distilled water was used throughout the experiment. All other reagents and solvents were commercially available at analytical grade and were used without further purification.  $^1\text{H}$  NMR spectra were recorded on Mercury-400BB spectrometer (400MHz) and Bruker Digital RF spectrometer (300MHz).  $^1\text{H}$  chemical shifts are reported in ppm downfield from tetramethylsilane (TMS, TM scale with the solvent resonances as internal standards). Mass spectra were performed on a Bruker Esquire 3000 plus mass spectrometer (Bruker-FranzenAnalytik GmbH Bremen, Germany) equipped with ESI interface and ion trap analyzer. The X-ray diffraction analysis (XRD) was performed on a Rigaku D/Max-2400 X-Ray Diffractometer. The morphologies and sizes of the xerogels were characterized using field emission scanning electron microscopy (FE-SEM, JSM-6701F) at an accelerating voltage of 8 kV. The infrared spectra were performed on a Digilab FTS-3000 Fourier transform-infrared spectrophotometer. Melting points were measured on an X-4 digital melting-point apparatus (uncorrected). Ultraviolet-visible (UV-vis) spectra were recorded on a Shimadzu UV-2550 spectrometer. Fluorescence spectra were recorded on a Shimadzu RF-5301PC spectrofluorophotometer.

## 2. Synthesis and characterizations of compound PN and WP5.

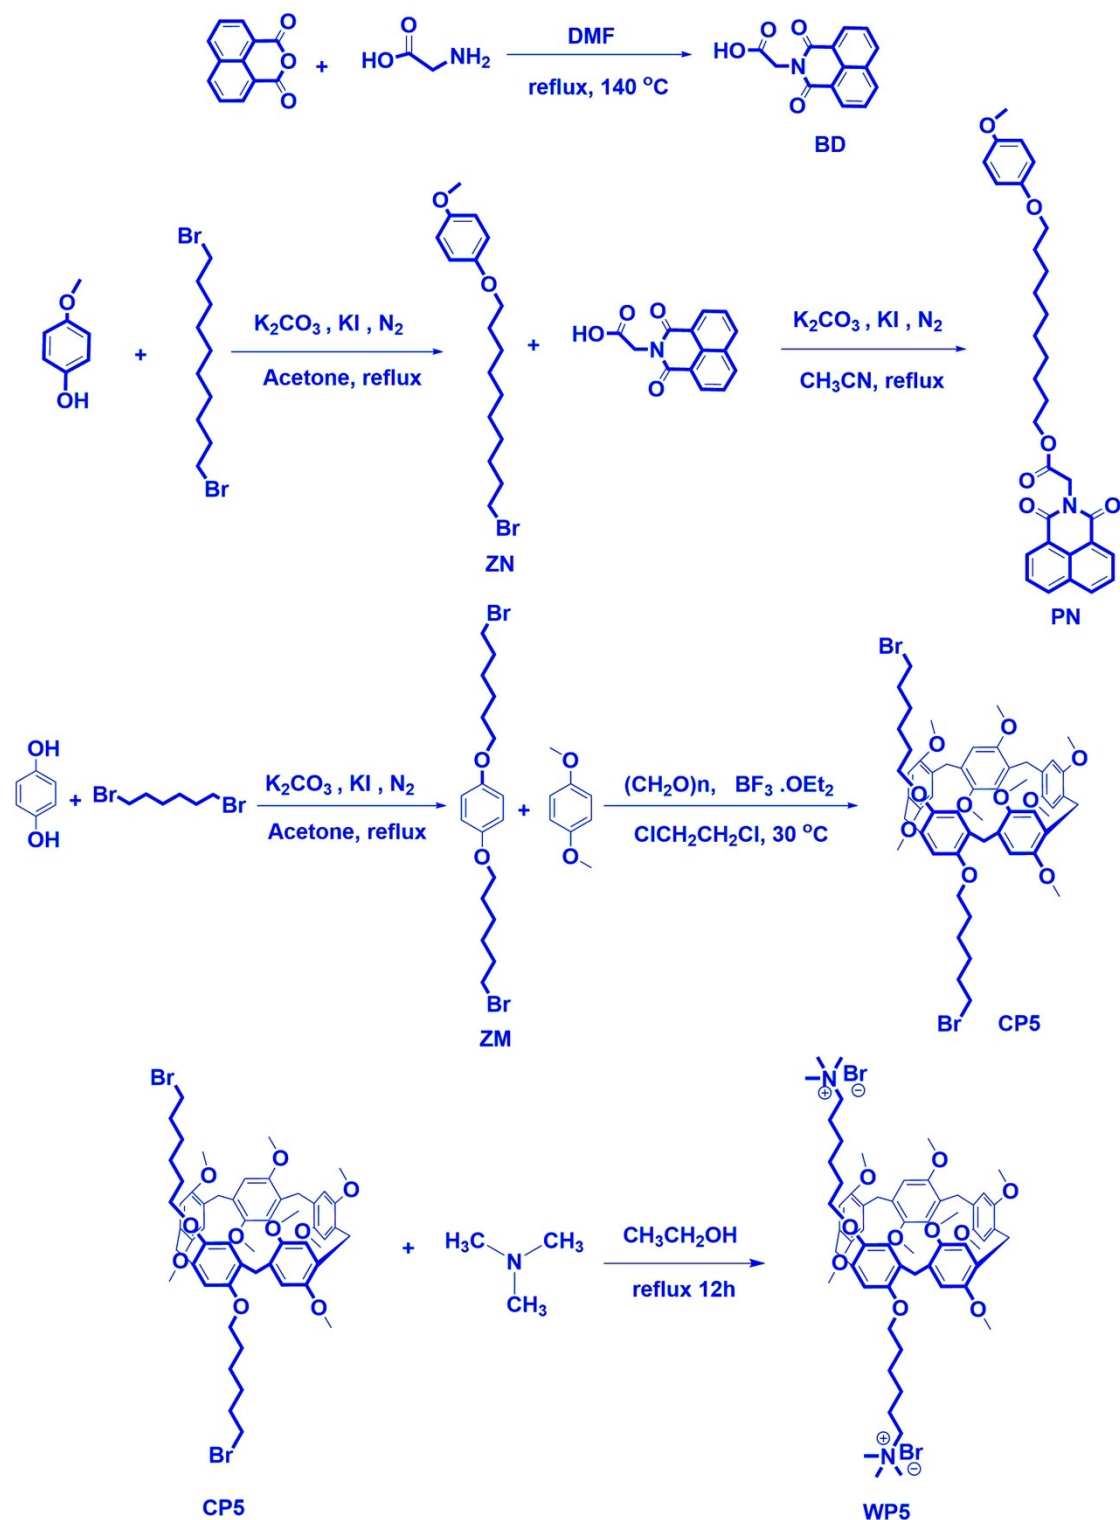

**Scheme S1** Synthesis of compound PN and WP5.

**Synthesis of compound BD:** A mixture of 1,8-naphthalenedicarboxylic anhydride (1.98 g, 10.0 mmol), glycine (1.13 g, 15.0 mmol) in anhydrous



DMF (20 mL) was stirred at 140 °C reflux for 24 h. After cooling to room temperature, add water and the precipitate was filtered, then with acetonitrile recrystallization get gray powder product BD. yield 65%; m.p. >300 °C;  $^1\text{H}$  NMR (600 MHz,  $\text{DMSO-}d_6$ )  $\delta$  13.06 (s, 1H), 8.48 (m, 4H), 7.88 (t, 2H), 4.72 (s, 2H). ESI-MS  $m/z$ :  $[\text{2(BD)+Na}]^+$  Calcd for  $\text{C}_{28}\text{H}_{18}\text{N}_2\text{NaO}_8$ , 533.0961; Found 533.09.

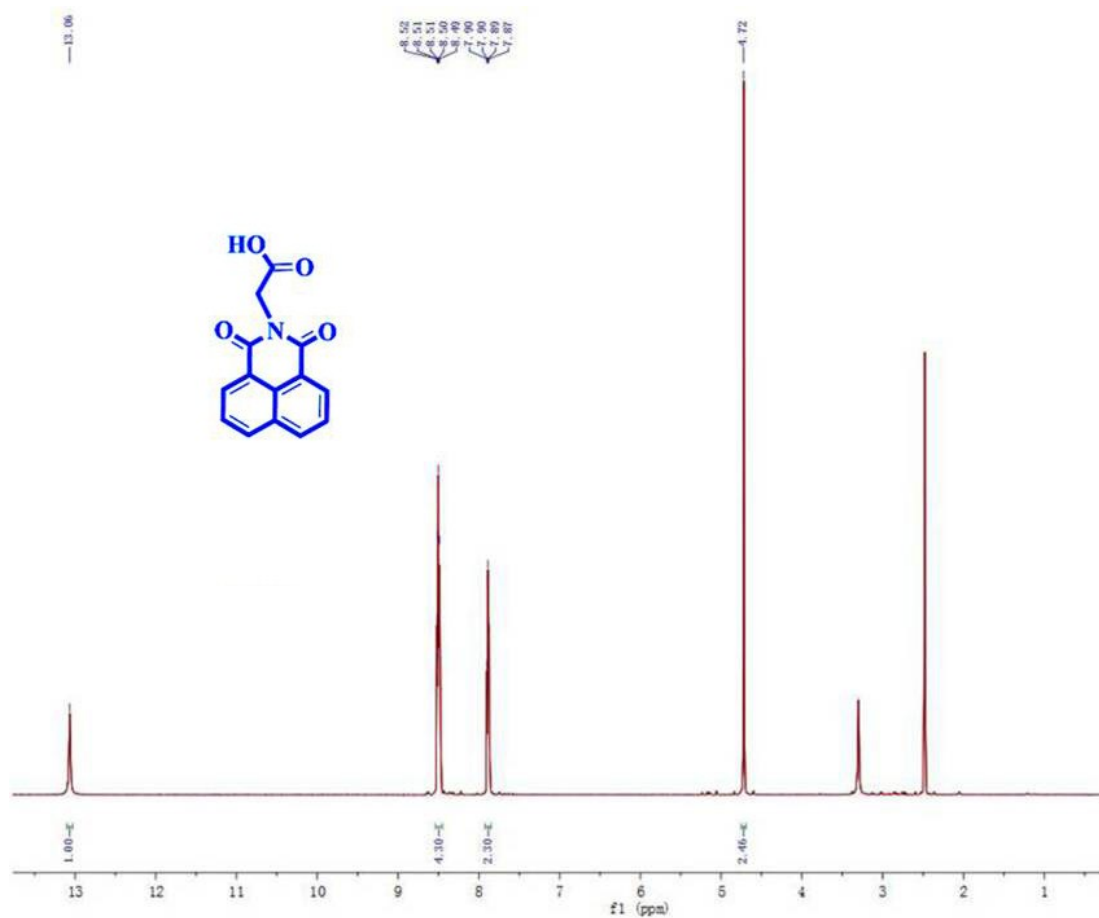

**Fig. S1**  $^1\text{H}$  NMR spectrum of **BD** in  $\text{DMSO-}d_6$ .

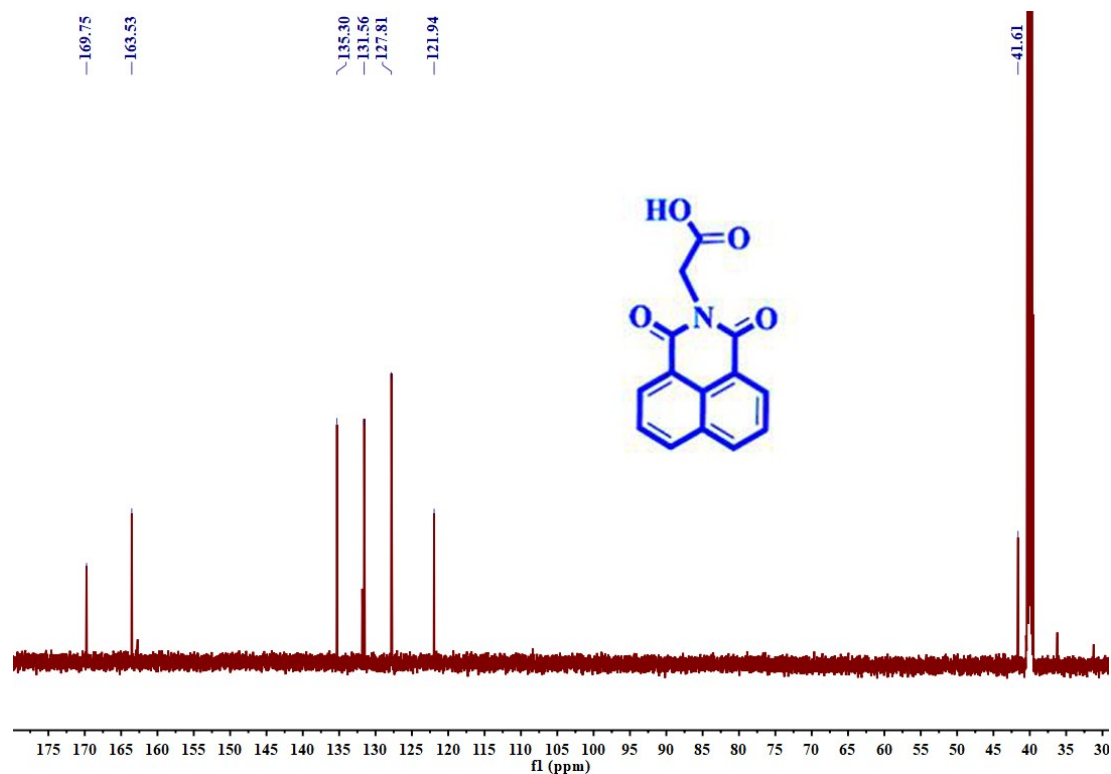

**Fig. S2**  $^{13}\text{C}$  NMR spectra (151MHz,  $\text{DMSO-}d_6$ ) of ND.

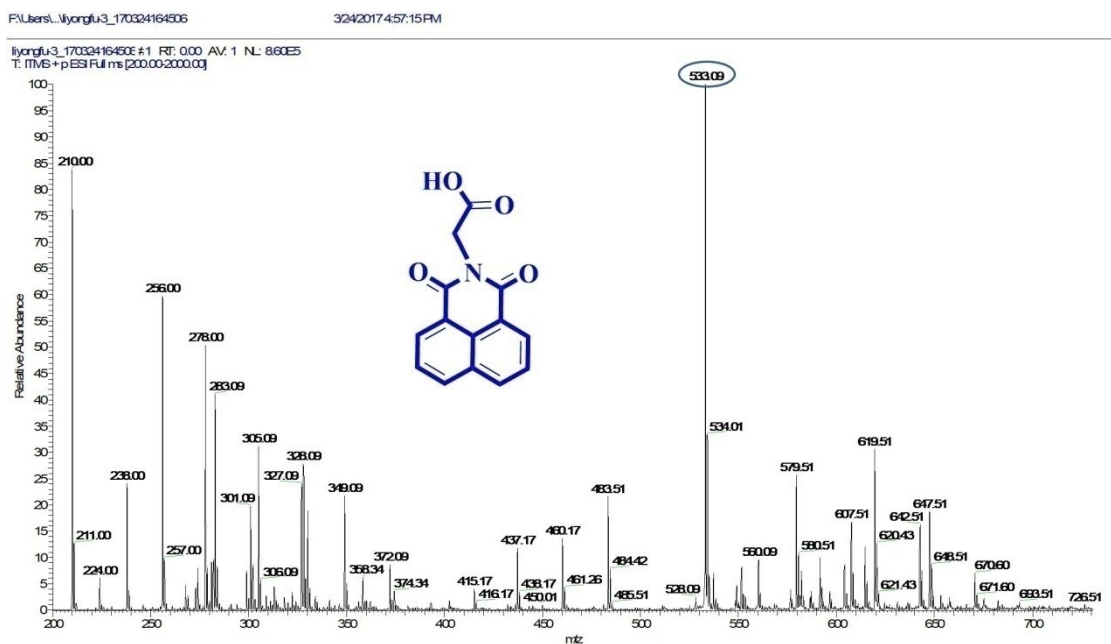

**Fig. S3** ESI-MS spectrum of BD.

**Synthesis of compound PN:** A mixture of 4-methoxyphenol (2.48 g, 20.0 mmol),  $\text{K}_2\text{CO}_3$  (13.82 g, 100 mmol), KI (3.32 g, 20 mmol), 1,10-dibormodecane (24.01 g, 80 mmol) and acetone (400.0 mL) were added

to a 500 mL round-bottom flask under nitrogen atmosphere. The reaction mixture was stirred at 65 °C for 72 h. After the solid was filtered off, the solvent was evaporated and the residue was dissolved in CH<sub>2</sub>Cl<sub>2</sub>. The crude product was purified by silica gel column chromatography using petroleum ether/ethyl acetate (V/V = 50:1) as the eluent, compound **ZN** as white solid (6.53 g, yield 95%) was obtained. Mp: 60-64 °C. <sup>1</sup>H NMR (600 MHz, CDCl<sub>3</sub>) δ 6.83 (s, 4H), 3.90 (t, *J* = 6.6 Hz, 2H), 3.76 (s, 3H), 3.40 (t, *J* = 6.9 Hz, 2H), 1.84 (dp, *J* = 12.9, 7.2 Hz, 2H), 1.75 (p, *J* = 6.8 Hz, 2H), 1.45 – 1.42 (m, 2H), 1.39 – 1.17 (m, 10H). <sup>13</sup>C NMR (CDCl<sub>3</sub>, 151 MHz), δ/ppm: 153.64, 153.27, 115.41, 114.59, 68.62, 55.73, 34.01, 32.81, 29.42, 29.36, 29.33, 29.32, 28.72, 28.14, 26.02. ESI-MS *m/z*: calcd for C<sub>17</sub>H<sub>27</sub>BrO<sub>2</sub> [**ZN**]: 342.12; found: 342.01.

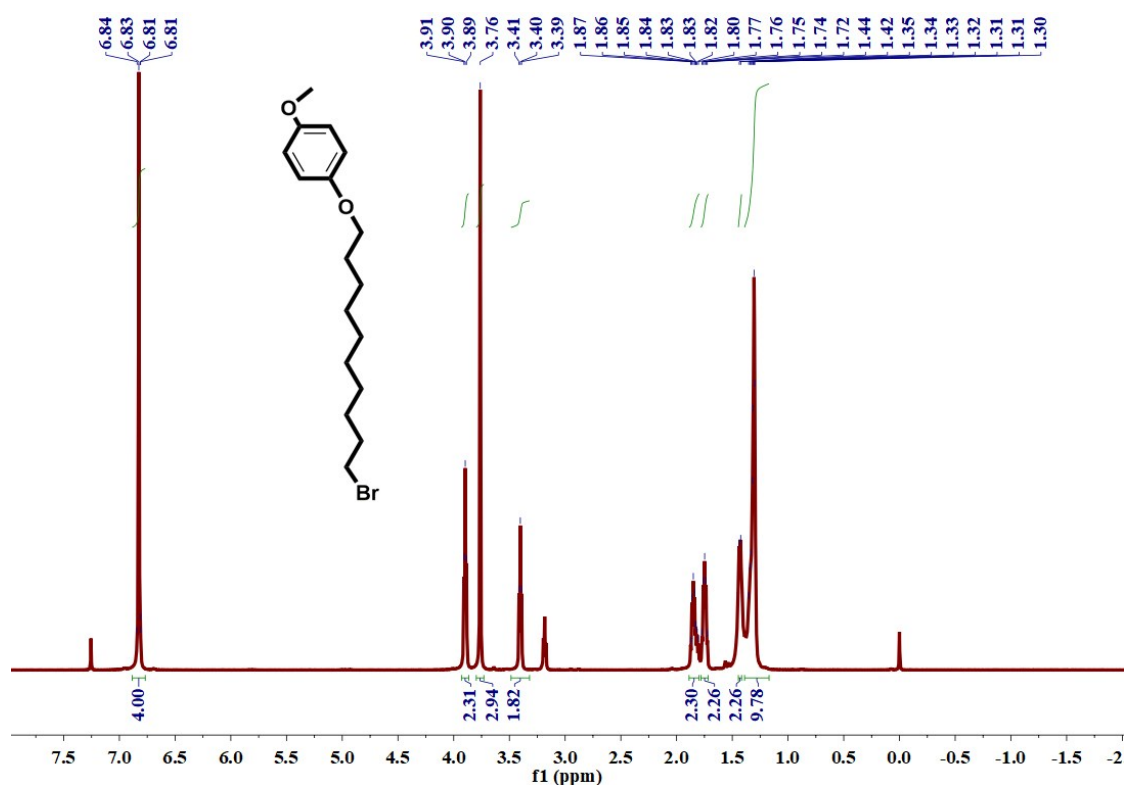

**Fig. S4** <sup>1</sup>H NMR spectrum of compound **ZN** in CDCl<sub>3</sub>.

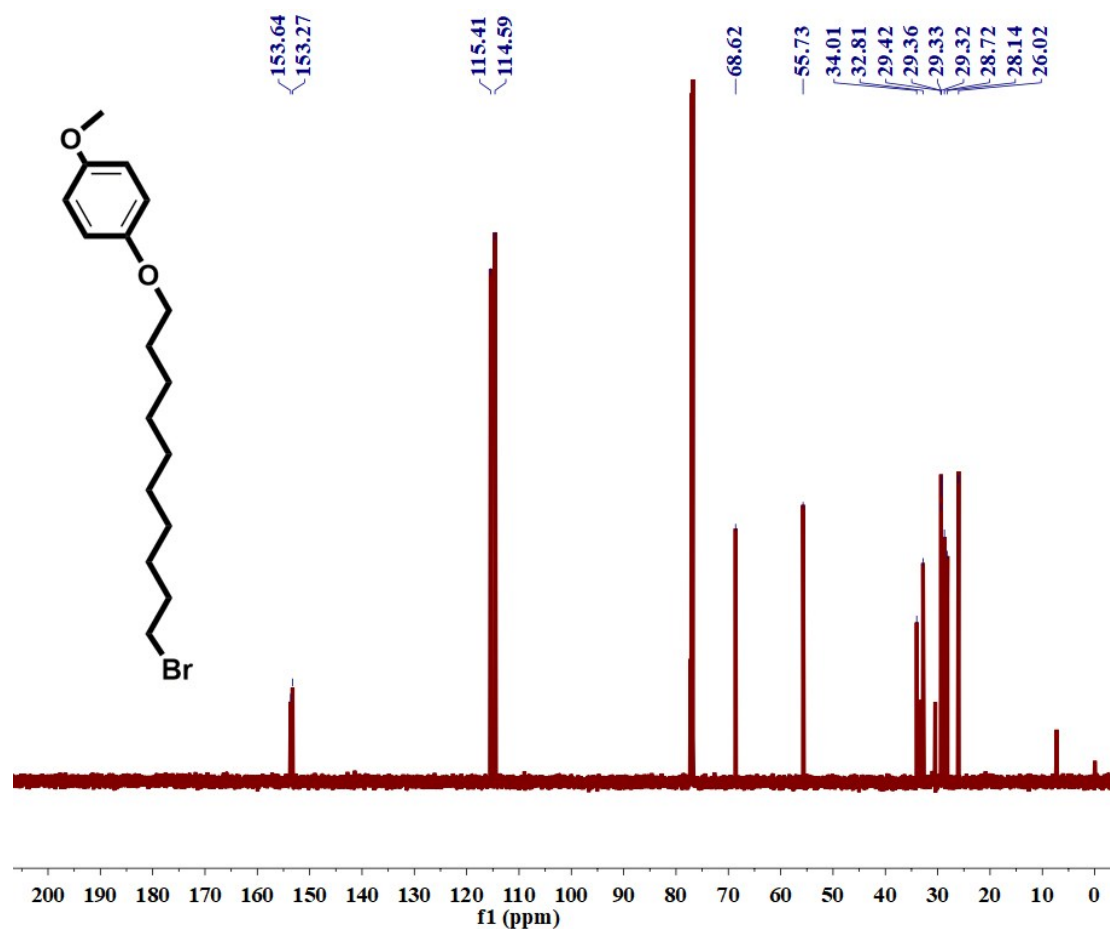

Fig. S5  $^{13}\text{C}$  NMR spectrum of compound ZN in  $\text{CDCl}_3$ .

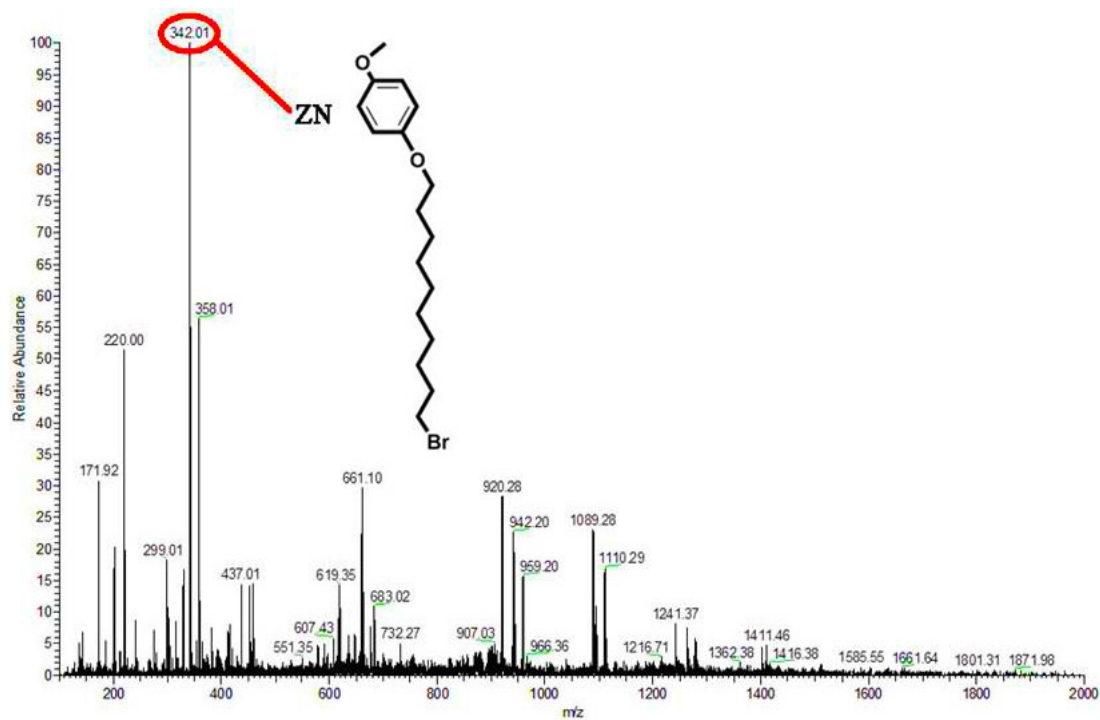

Fig. S6 ESI-MS spectrum of compound ZN.

In a 100 mL round bottom flask, compound **ZN** (0.43 g, 1.25 mmol),  $K_2CO_3$  (1.55 g, 11.25 mmol), KI (0.08 g, 0.5 mmol), **BD** (0.26 g, 1.0 mmol) and acetonitrile (75 ml) was added and the reaction mixture was stirred for 48 h at 85 °C . After removal of the inorganic salt by filtration, the solvent was evaporated and afford the crude product, which was isolated by flash column chromatography using petroleum ether/ethyl acetate (10:1). The fractions containing the product were combined and concentrated under vacuum to give **PN** (0.45 g, yield 85%) as a white solid. Mp: 90 - 91 °C.  $^1H$  NMR (600 MHz,  $DMSO-d_6$ )  $\delta$  8.51 (dd,  $J = 12.7, 7.8$  Hz, 4H), 7.91 – 7.86 (m, 2H), 6.81 (d,  $J = 1.4$  Hz, 4H), 4.80 (s, 2H), 4.07 (t,  $J = 6.4$  Hz, 2H), 3.84 (t,  $J = 6.5$  Hz, 2H), 3.65 (d,  $J = 3.6$  Hz, 3H), 1.65 – 1.59 (m, 2H), 1.54 – 1.49 (m, 2H), 1.35 – 1.29 (m, 2H), 1.23 – 1.10 (m, 10H).  $^{13}C$  NMR (101 MHz,  $DMSO-d_6$ )  $\delta$  168.55 , 163.74 , 154.01 , 153.47 , 135.54 , 131.79 , 127.98 , 122.14 , 116.10 , 115.34 , 68.71 , 65.60 , 56.10 , 41.91 , 29.41 , 29.12 , 25.88 . ESI-MS  $m/z$ :  $[PN+Na]^+$  Calcd for  $C_{31}H_{35}NNaO_6$ , 540.24; Found 540.26.

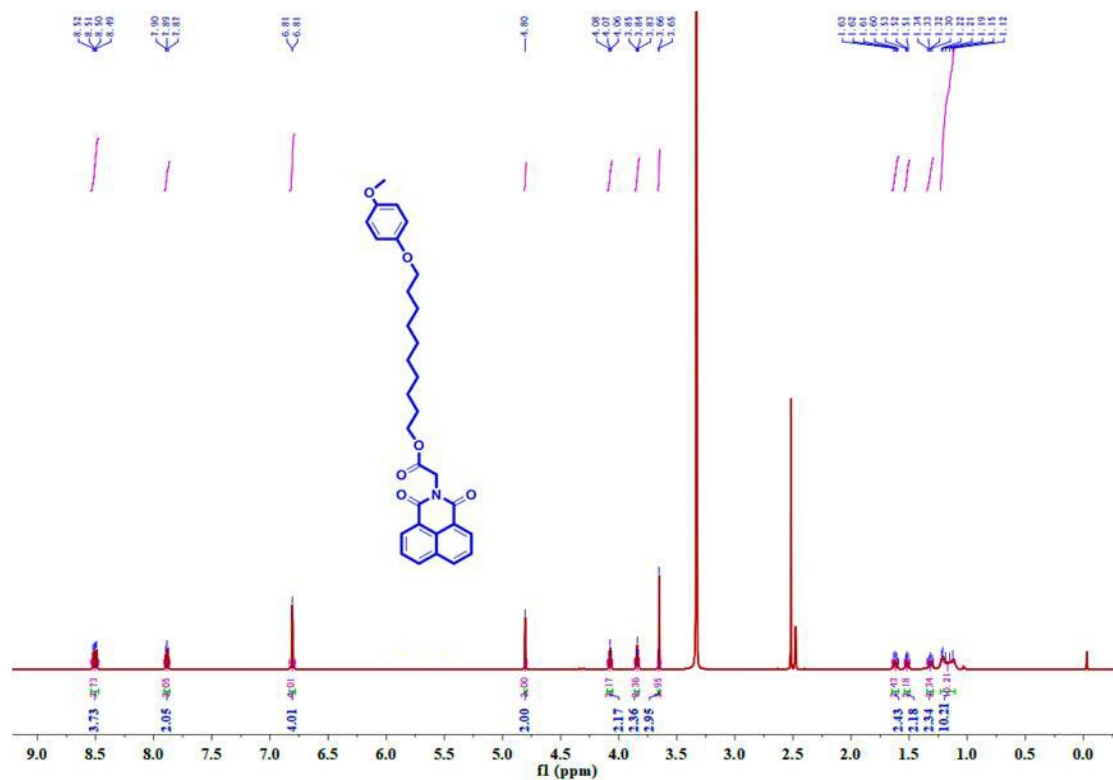

**Fig. S7**  $^1\text{H}$  NMR spectra (600 MHz,  $\text{DMSO-}d_6$ ) of PN.

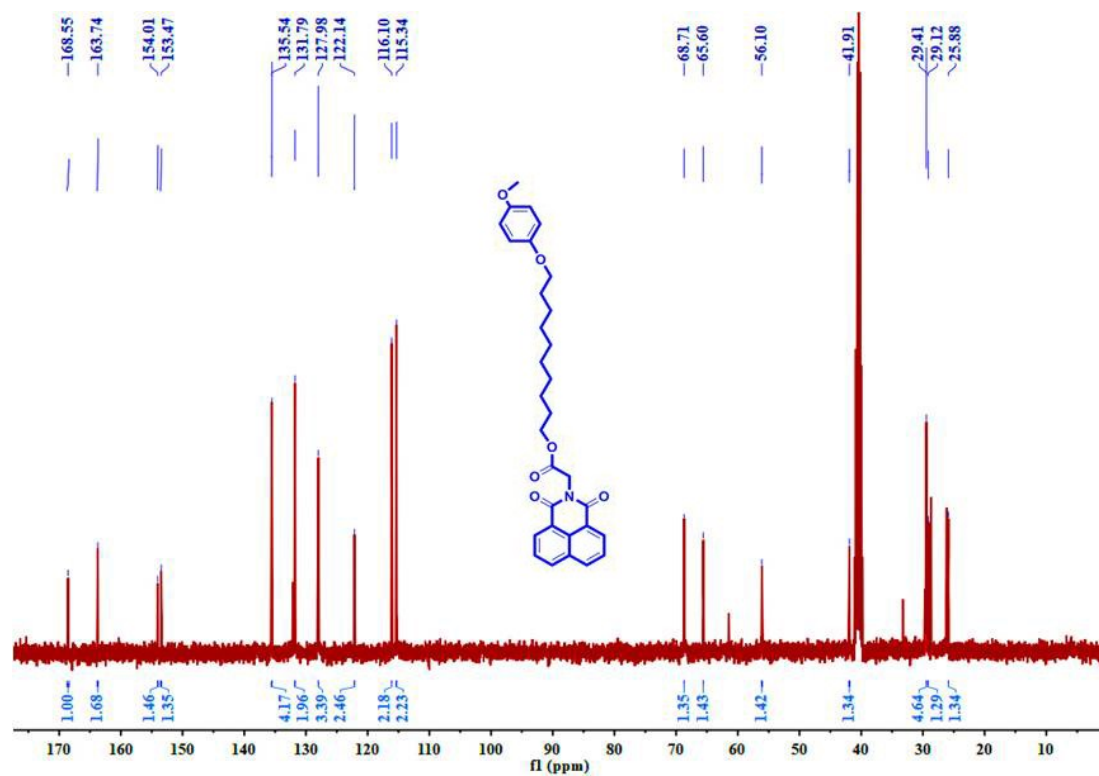

**Fig. S8**  $^{13}\text{C}$  NMR spectra (151 MHz,  $\text{DMSO-}d_6$ ) of PN.

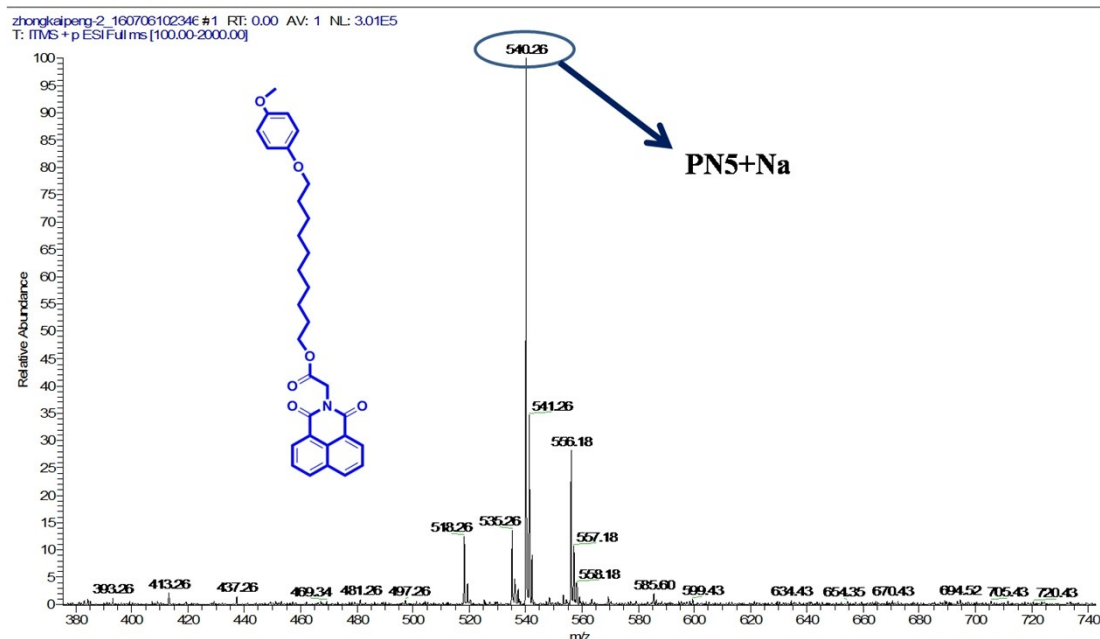

**Fig. S9** ESI-MS spectrum of PN.

**Synthesis of 1, 4-bis(4-bromohexyloxy)benzene ZM:** Hydroquinone (2.3 g, 20.0 mmol),  $K_2CO_3$  (16.6 g, 120 mmol), KI (6.6 g, 40 mmol), 1, 4-dibromobutane (34.6 g, 160 mmol) and acetone (400.0 mL) were added in a 500mL round bottom flask stirred at room temperature. The reaction mixture was stirred at reflux for 1.5 days. After the solid was filtered off, the solvent was evaporated and the residue was dissolved in  $CH_2Cl_2$ . Column chromatography (silica gel; petroleum ether:  $CH_2Cl_2$  = 10:1) afforded a white solid (6.0 g yield 70%). m.p.: 87 °C.  $^1H$  NMR (600 MHz,  $CDCl_3$ )  $\delta$  6.81 (s, 4H), 3.90 (t, 4H), 3.42 (t, 4H), 1.89 (m, 4H), 1.77 (m, 4H), 1.49 (m, 8H). ESI-MS m/z:  $[ZM+H]^+$  Calcd for  $C_{18}H_{29}Br_2O_2$ , 437.05; Found 437.01.

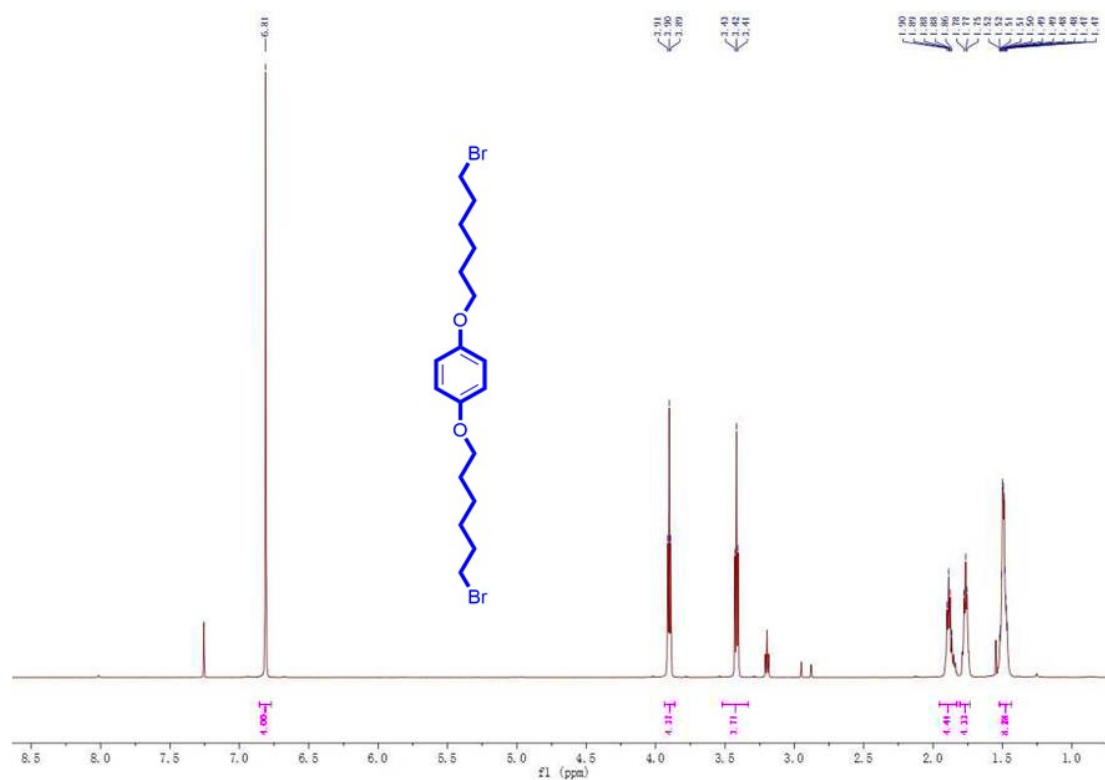

**Fig. S10**  $^1\text{H}$  NMR spectra (600 MHz,  $\text{CDCl}_3$ ) of **ZM**.

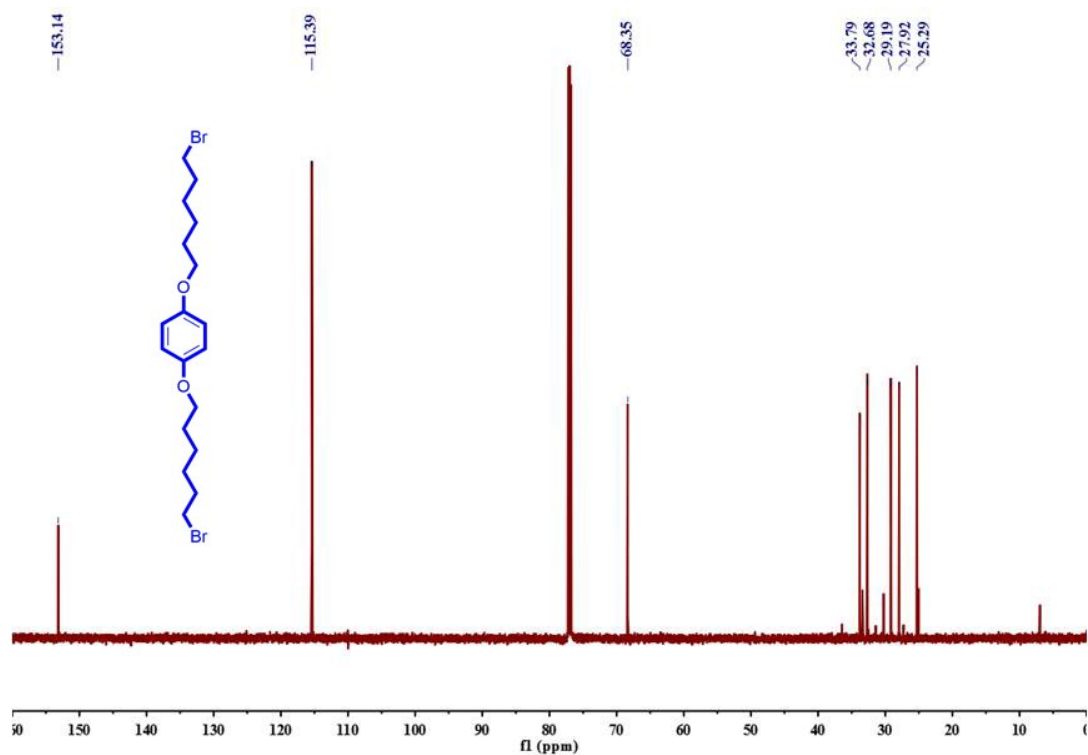

**Fig. S11**  $^{13}\text{C}$  NMR spectra (151 MHz,  $\text{CDCl}_3$ ) of **ZM**.



liyongfu-1\_161214113220 #2 RT: 0.00 AV: 1 NL: 3.54E5  
T: ITMS + p ESI Full ms [100.00-2000.00]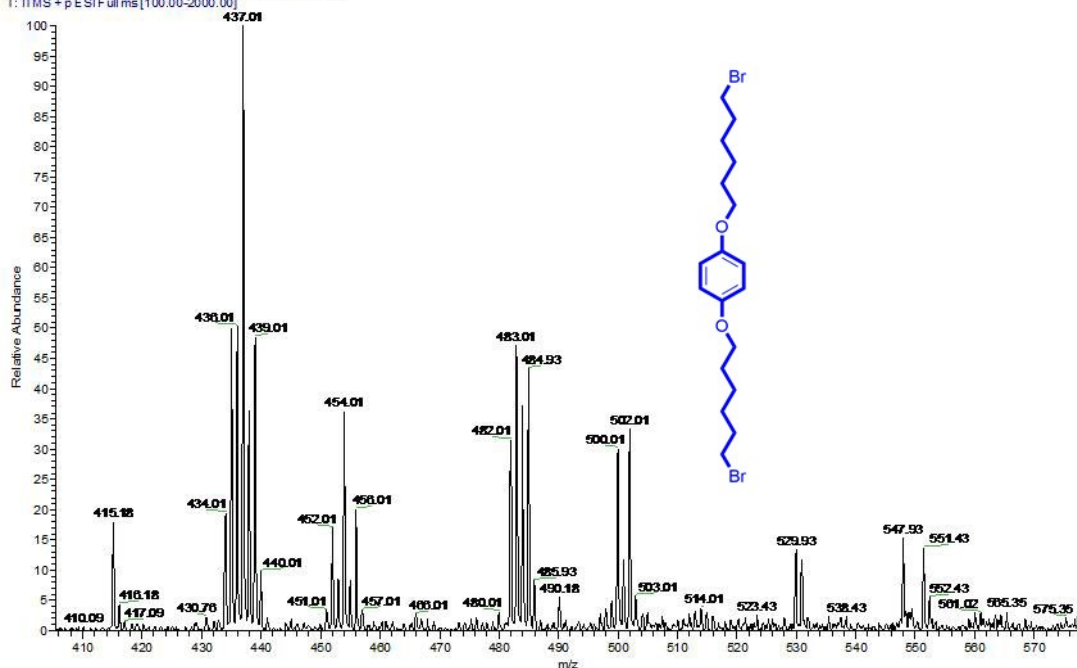

**Fig. S12** ESI-MS spectrum of **ZM**.

**Synthesis of Copillar[5]arene CP5.** To a solution of 1, 4-bis (4-bromohexyloxy) benzene (1.9 g, 5.0 mmol) and 1,4-dimethoxybenzene (2.76 g, 20.0 mmol) in 1, 2-dichloroethane (200 mL), paraformaldehyde (0.75 g, 25.0 mmol) was added under nitrogen atmosphere. Then boron trifluoride diethyl etherate (6.75 mL, 25 mmol) was added to the solution and the mixture was stirred at room temperature for 4 h and concentrated by rotary evaporation. The resultant oil was dissolved in CH<sub>2</sub>Cl<sub>2</sub> and washed twice with H<sub>2</sub>O. The organic layer was dried over anhydrous Na<sub>2</sub>SO<sub>4</sub> and evaporated to afford the crude product, which was isolated by flash column chromatography using petroleum ether/ethyl acetate (20 : 1,v/v) to give **CP5** 2.0219 g (38.66%) as a white solid. m.p.:185-189 °C. <sup>1</sup>H NMR (600 MHz, CDCl<sub>3</sub>, room temperature) δ (ppm): 6.93(m, 10H),

3.82(m, 34H), 3.69(s, 4H), 1.49(m,16H), 0.87(m, 4H). ESI-MS m/z:  
 [C<sub>55</sub>H<sub>68</sub>O<sub>10</sub>Br<sub>2</sub> + NH<sub>4</sub><sup>+</sup>] Calcd for 1066.3493; Found 1066.3496.

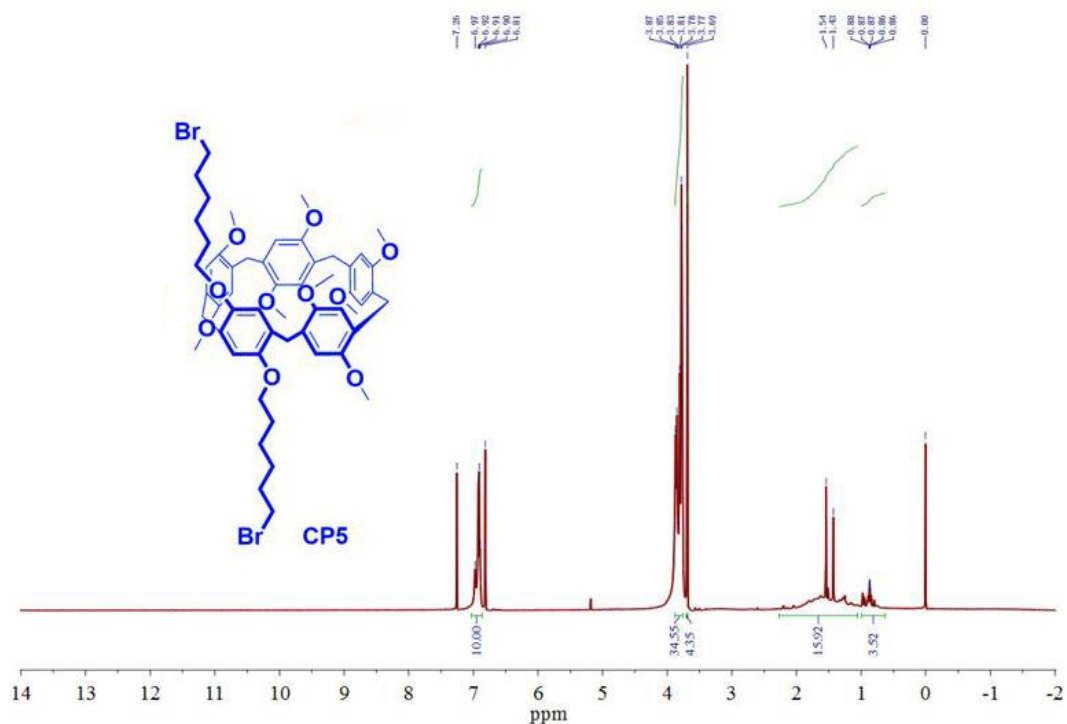

**Fig. S13** <sup>1</sup>H NMR spectra (600 MHz, CDCl<sub>3</sub>) of CP5.

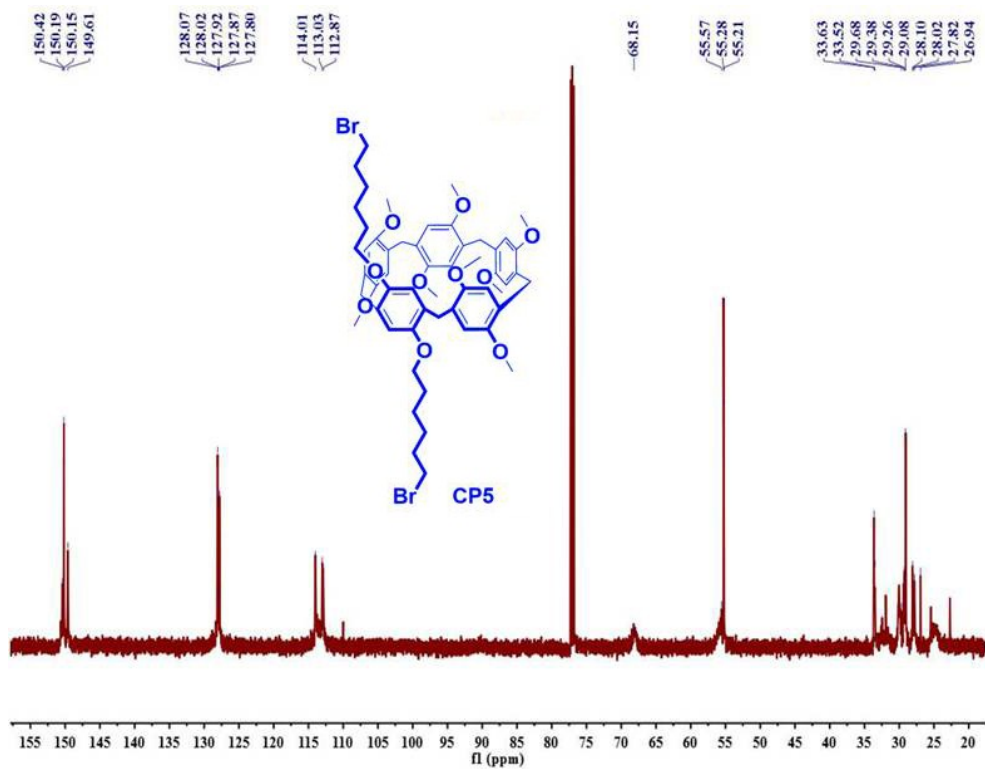

**Fig. S14** <sup>13</sup>C NMR spectra (151 MHz, CDCl<sub>3</sub>) of CP5.

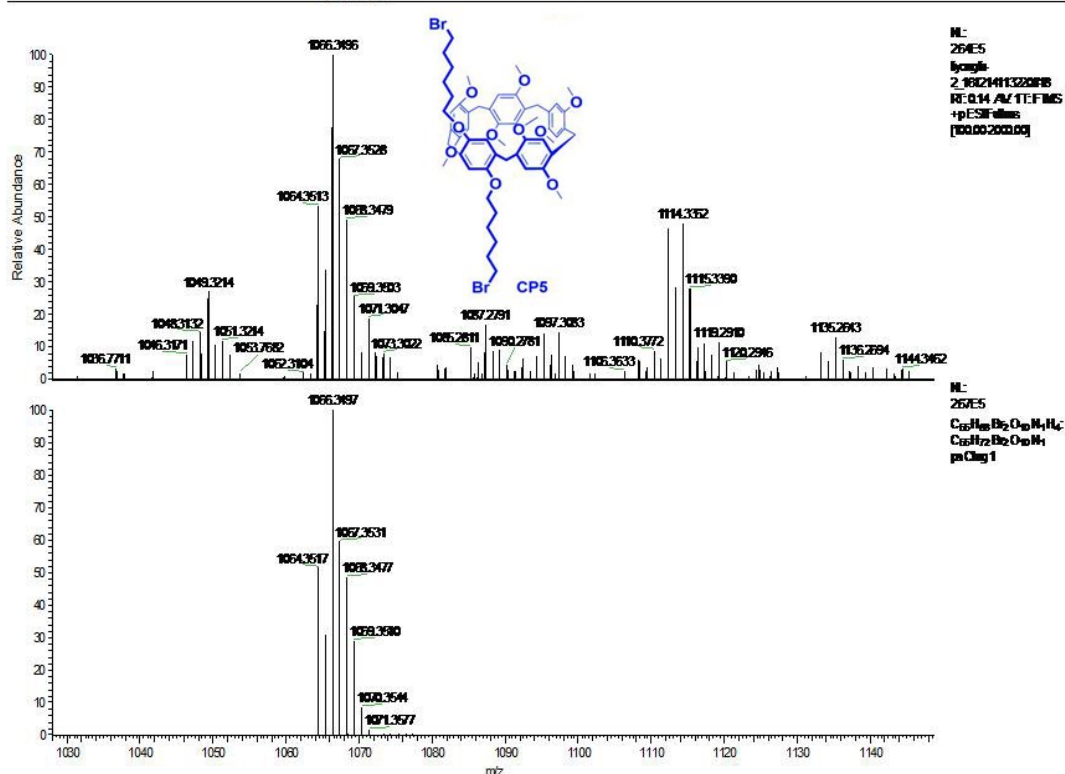

**Fig. S15** High resolution mass data of compound **CP5**.

**Synthesis of host compound WP5:** Copillar[5]arene **CP5** (0.5 g, 0.5 mmol) and trimethylamine (33 % in ethanol, 1.0 mL, 3.7 mmol) were added to ethanol (80 mL). The solution was refluxed overnight. Then the solvent was removed by evaporation, you can afford a white solid. After white solid was washed by diethyl ether to obtain **WP5** as a white solid (0.52 g, 93 %). Mp 176–178 °C. <sup>1</sup>H NMR (400 MHz, DMSO-*d*<sub>6</sub>) δ 7.00 – 6.67 (m, 10H), 3.95 (d, *J* = 70.8 Hz, 4H), 3.83 – 3.53 (m, 34H), 3.43 (t, *J* = 7.0 Hz, 4H), 3.07 (d, *J* = 6.1 Hz, 18H), 1.71 (s, 8H), 1.56 (s, 4H), 1.40 – 1.29 (m, 4H). <sup>13</sup>C NMR (151 MHz, DMSO-*d*<sub>6</sub>) δ 150.34, 149.61, 128.04, 113.77, 68.08, 65.68, 55.99, 55.93, 55.91, 55.84, 52.61, 36.16, 31.18, 29.48, 26.17, 25.83, 22.54. ESI-MS *m/z*: [C<sub>61</sub>H<sub>86</sub> BrN<sub>2</sub>O<sub>10</sub><sup>+</sup>] Calcd

for 1087.27; Found 1087.3384.

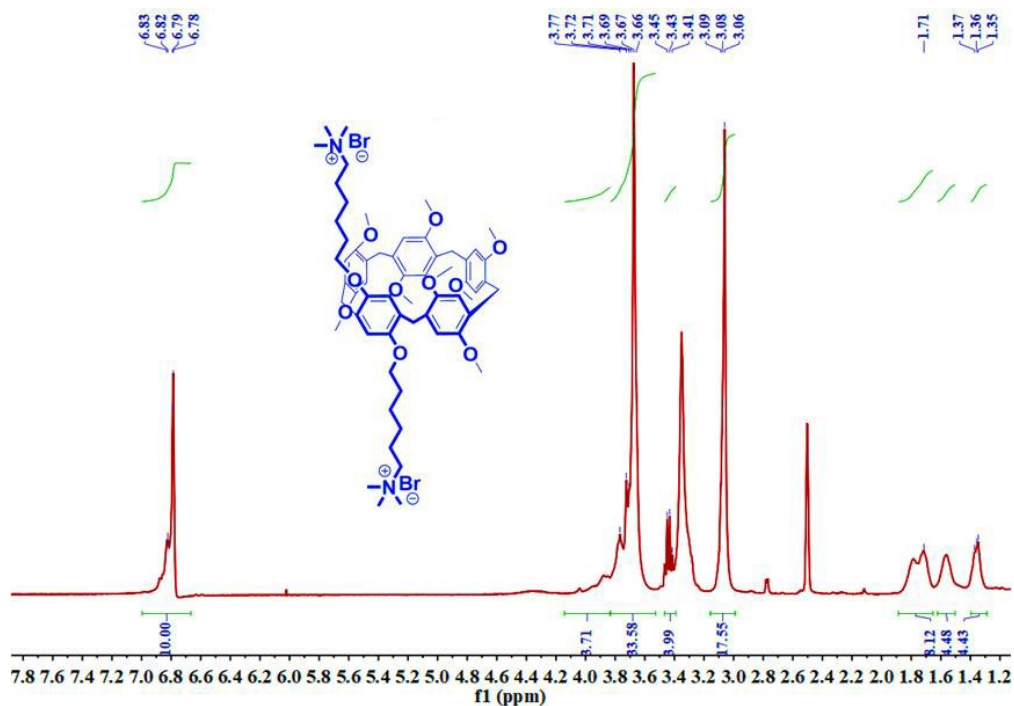

**Fig. S16** <sup>1</sup>H NMR spectra (400 MHz, DMSO-*d*<sub>6</sub>) of **WP5**.

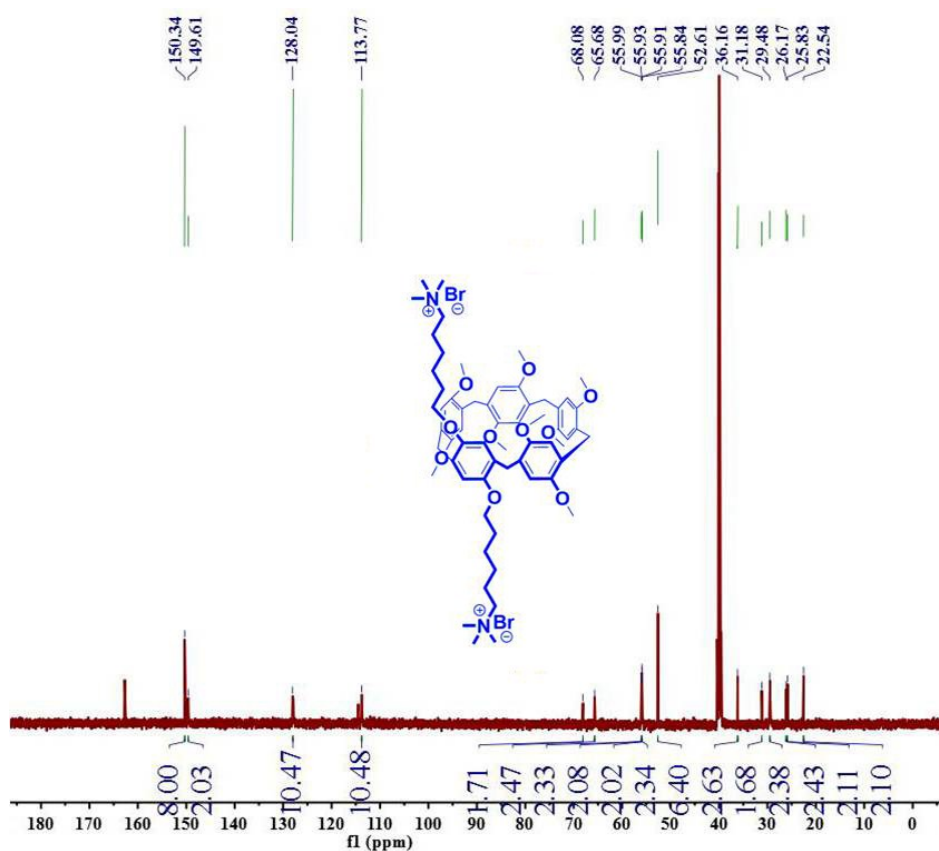

**Fig. S17** <sup>13</sup>C NMR spectra (151 MHz, DMSO-*d*<sub>6</sub>) of **WP5**.

## Generic Display Report

### Analysis Info

Analysis Name D:\Data\YANGY\New\LIYONGFU170728\_1.d  
Method POS\_300-3000\_For LC.m  
Sample Name LIYONGFU170728\_1  
Comment

Acquisition Date 7/28/2017 11:54:22 AM

Operator LZU  
Instrument micrOTOF

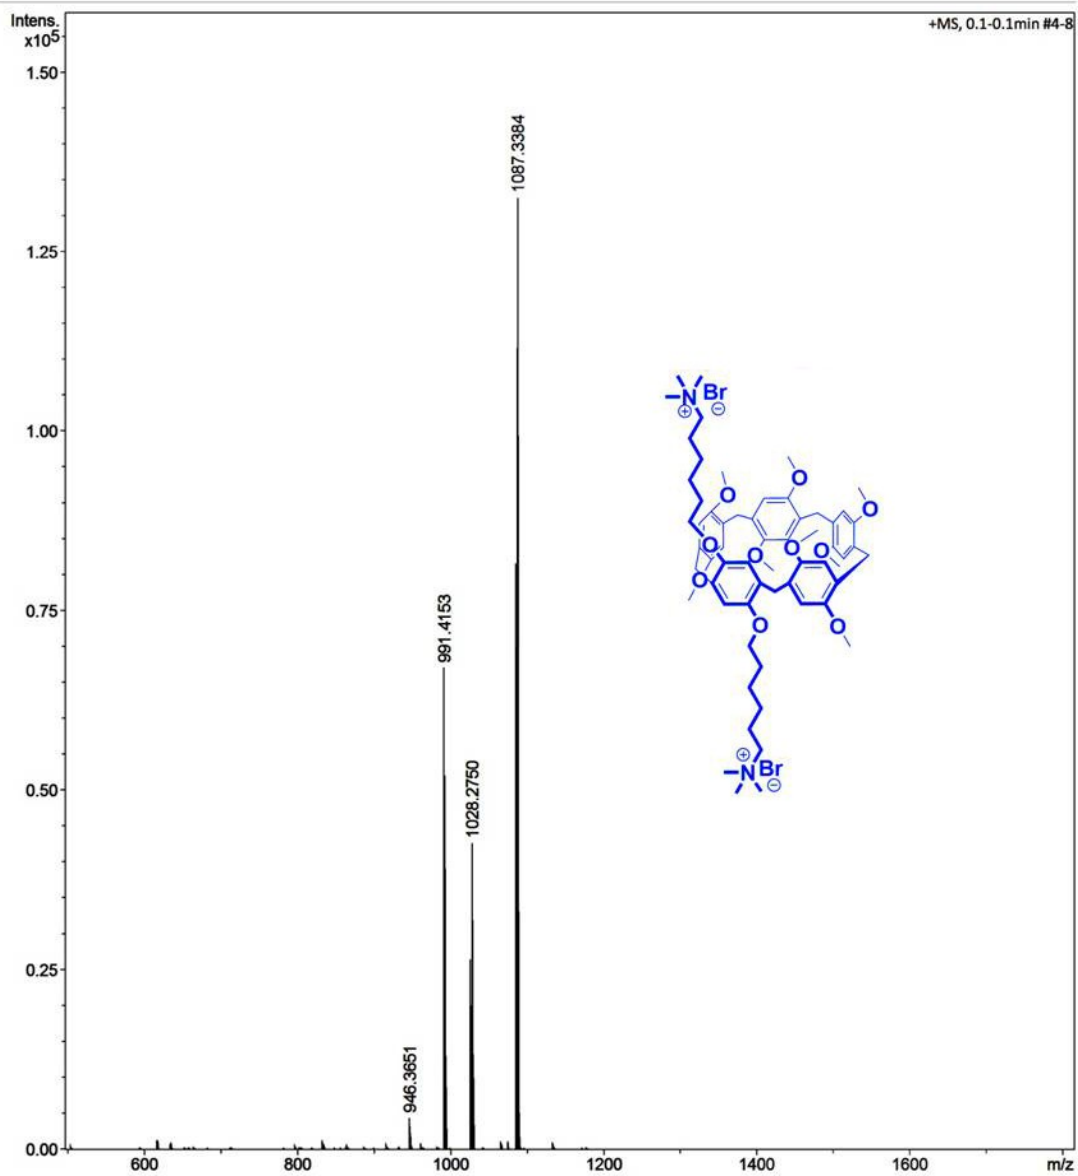

**Fig. S18** ESI-MS spectrum of compound **WP5**.

**Table S1.** Gelation Property of supramolecular gel **WP5-PN-G**.

| Entry | Solvent                                             | State <sup>a</sup> | CGC <sup>b</sup> (%) | Tgel <sup>c</sup> (°C,<br>wt%) |
|-------|-----------------------------------------------------|--------------------|----------------------|--------------------------------|
| 1     | DMSO                                                | S                  | \                    | \                              |
| 2     | DMSO/H <sub>2</sub> O(1:1)                          | G                  | 10.5%                | 52                             |
| 3     | DMF                                                 | S                  | \                    | \                              |
| 4     | DMF/H <sub>2</sub> O(1:1)                           | P                  | \                    | \                              |
| 5     | CH <sub>3</sub> CN                                  | P                  | \                    | \                              |
| 6     | CH <sub>3</sub> CN/H <sub>2</sub> O                 | P                  | \                    | \                              |
| 7     | CH <sub>3</sub> CH <sub>2</sub> OH                  | P                  | \                    | \                              |
| 8     | CH <sub>3</sub> CH <sub>2</sub> OH/H <sub>2</sub> O | P                  | \                    | \                              |
| 9     | CH <sub>3</sub> OH                                  | P                  | \                    | \                              |
| 10    | CH <sub>2</sub> ClCH <sub>2</sub> Cl                | P                  | \                    | \                              |
| 11    | CH <sub>2</sub> Cl <sub>2</sub>                     | S                  | \                    | \                              |
| 12    | CHCl <sub>3</sub>                                   | S                  | \                    | \                              |
| 13    | THF                                                 | P                  | \                    | \                              |
| 14    | THF/H <sub>2</sub> O                                | S                  | \                    | \                              |
| 15    | Acetone                                             | P                  | \                    | \                              |
| 16    | ethyl acetate                                       | P                  | \                    | \                              |
| 17    | isopentanol                                         | P                  | \                    | \                              |
| 18    | n-hexane                                            | P                  | \                    | \                              |
| 19    | cyclohexanol                                        | G                  | 14%                  | 40                             |
| 20    | isopropanol                                         | P                  | \                    | \                              |
| 21    | n-butyl alcohol                                     | P                  | \                    | \                              |
| 22    | n-hexanol                                           | P                  | \                    | \                              |
| 23    | n-propanol                                          | P                  | \                    | \                              |
| 24    | tert butyl alcohol                                  | P                  | \                    | \                              |
| 25    | petroleum ether                                     | P                  | \                    | \                              |
| 26    | propionic acid                                      | S                  | \                    | \                              |
| 27    | n-hexylic acid                                      | S                  | \                    | \                              |

State:  $n_{WP5}/n_{PN} = 1/1$

<sup>a</sup>G, P and S denote gelation, precipitation and solution, respectively.

<sup>b</sup>The critical gelation concentration (wt%, 10mg/ml = 1.0% ).

<sup>c</sup>The gelation temperature (°C).

**Table S2.** Optimum water content of gelation conditions

| Entry | Water content | State <sup>a</sup> | Tgel <sup>b</sup> (°C) |
|-------|---------------|--------------------|------------------------|
| 1     | 0%            | S                  | \                      |
| 2     | 5%            | S                  | \                      |
| 3     | 10%           | P                  | \                      |
| 4     | 20%           | P                  | \                      |
| 5     | 30%           | P                  | \                      |
| 6     | 40%           | P                  | \                      |
| 7     | 50%           | G                  | 52                     |
| 8     | 60%           | G                  | 46                     |
| 9     | 70%           | P                  | \                      |
| 10    | 80%           | P                  | \                      |

<sup>a</sup>G, P and S denote gelation, precipitation and solution, respectively.

<sup>b</sup>The critical gelation concentration (wt%, 10mg/ml = 1.0% ).

<sup>c</sup>The gelation temperature (°C). C = 90 mM.

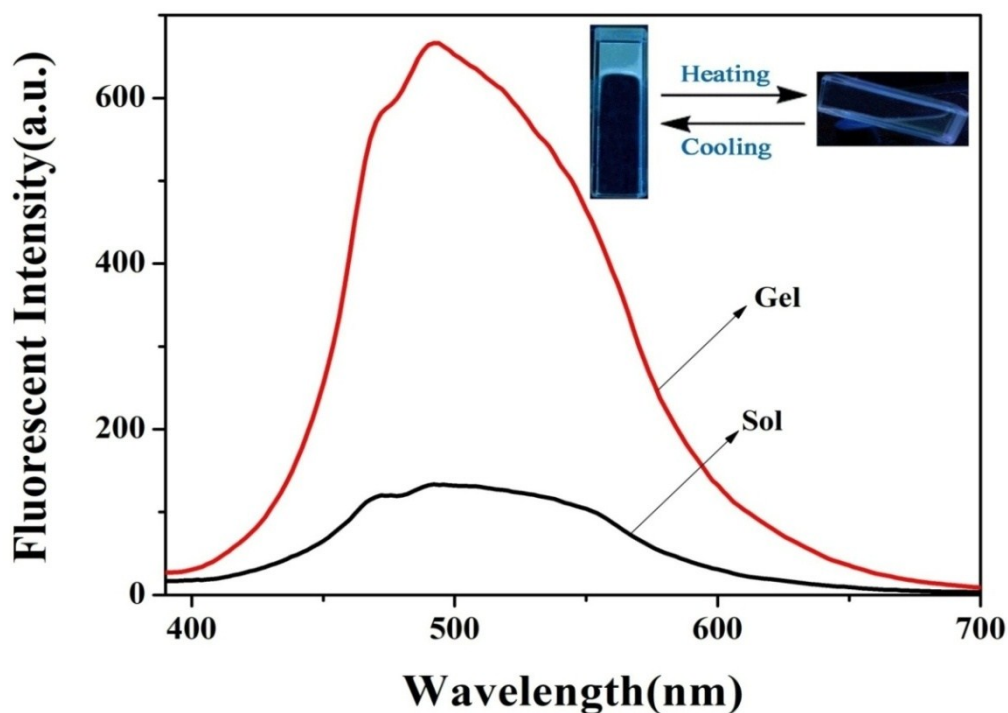

**Fig. S19** Fluorescence spectra of supramolecular gel **WP5-PN-G** (in gelated state, 10.5 %, w/v) and solution in the DMSO-H<sub>2</sub>O (1:1, v/v) system ( $\lambda_{\text{ex}} = 365$  nm).

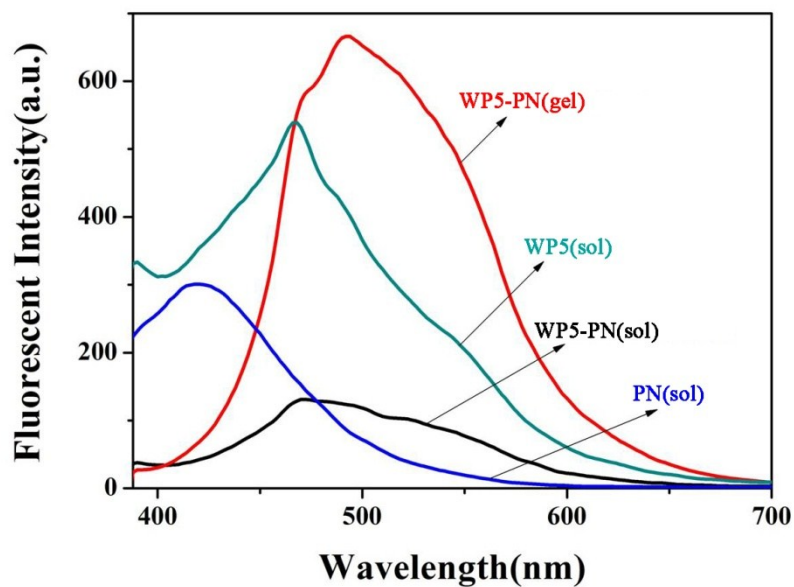

**Fig. S20** Fluorescence spectra of **WP5** ( $c = 90$  mM), **PN** ( $c = 87$  mM), **WP5-PN** sol ( $c = 90$  mM,  $T = 85$  °C  $> T_{gel}$ ) and the **WP5-PN-G** (in the DMSO-H<sub>2</sub>O (1:1, v/v) system,  $c = 90$  mM,  $T = 20$  °C  $< T_{gel}$ ,  $\lambda_{ex} = 365$  nm).

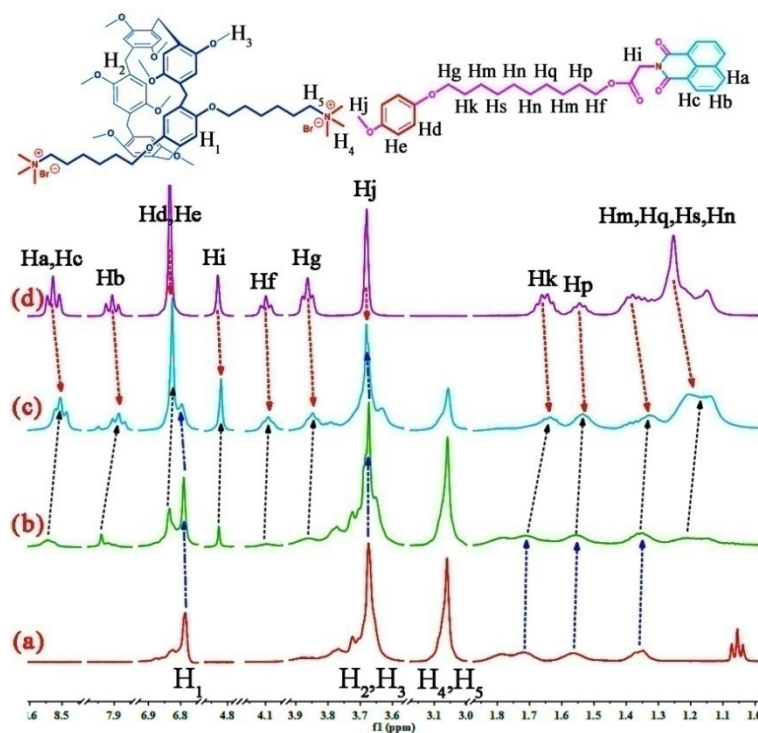

**Fig. S21** Partial <sup>1</sup>H NMR spectra of **WP5** (0.017 mol/L) in DMSO-*d*<sub>6</sub> with increasing amounts of **PN**, (a) Free **WP5**; (b) 0.5 equiv. (c) 2.0 equiv. (d) Free **PN**.



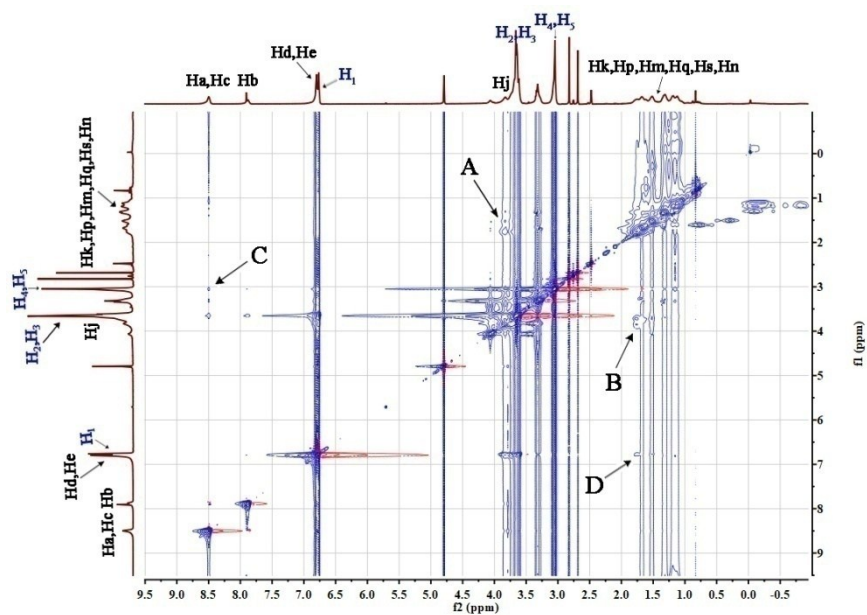

**Fig. S22** 2D NOESY NMR spectrum (600 MHz, 298 K) of 50.0 mM WP5 and PN in DMSO-*d*<sub>6</sub> solution.

## Generic Display Report

### Analysis Info

Analysis Name D:\Data\yang\new\LIYONGFU180615\_6\_01\_17479.d  
Method POS\_300-3000\_For LC.m  
Sample Name LIYONGFU180615  
Comment

Acquisition Date 6/15/2018 4:18:30 PM

Operator LZU  
Instrument micrOTOF

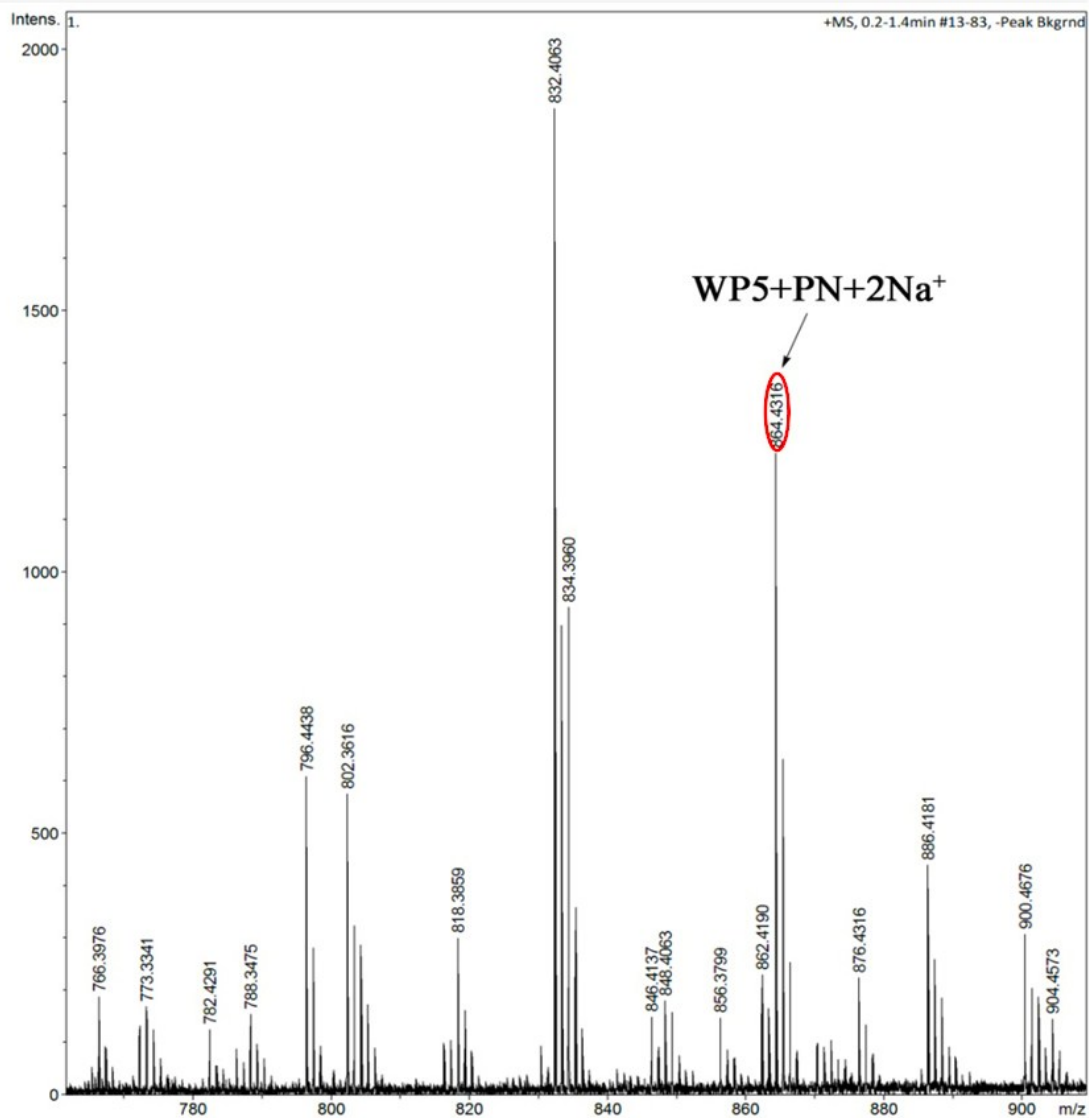

**Fig. S23** ESI-MS spectrum of the host-guest complex formed between **WP5** and **PN**.

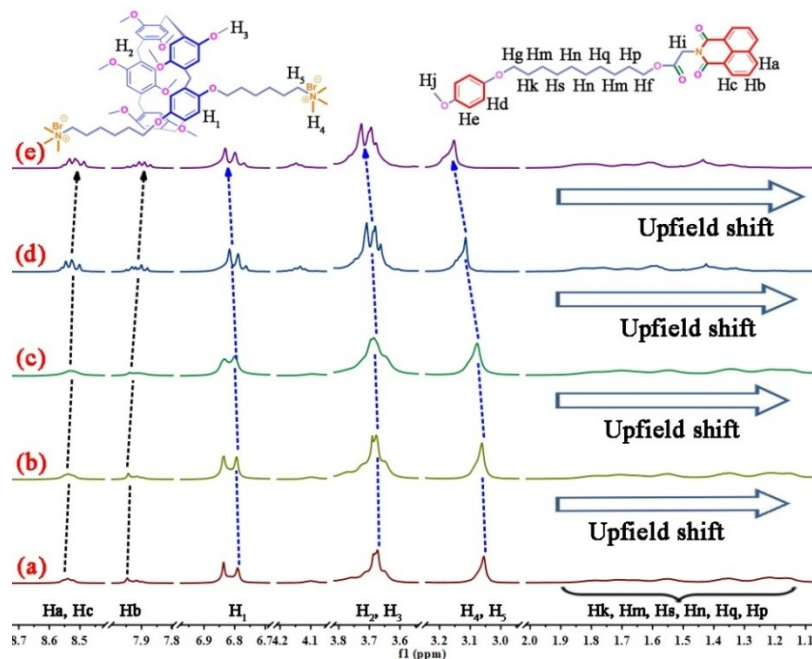

**Fig. S24**  $^1\text{H}$  NMR spectra (600 MHz, 298 K) of WP5-PN in  $\text{DMSO-}d_6$  at various concentrations: (a) 1.0 mM; (b) 2.0 mM; (c) 5.0 mM; (d) 10.0 mM; (e) 20.0 mM.

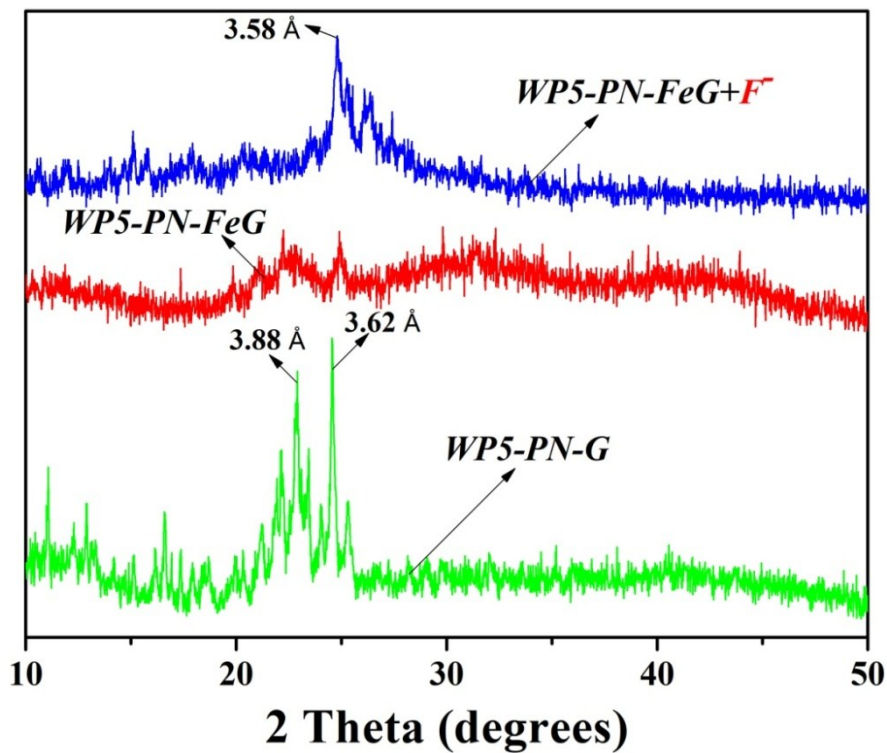

**Fig. S25** XRD diagrams of xerogel of WP5-PN-G, metallogel of WP5-PN-FeG, xerogel of WP5-PN-FeG +  $\text{F}^-$ .

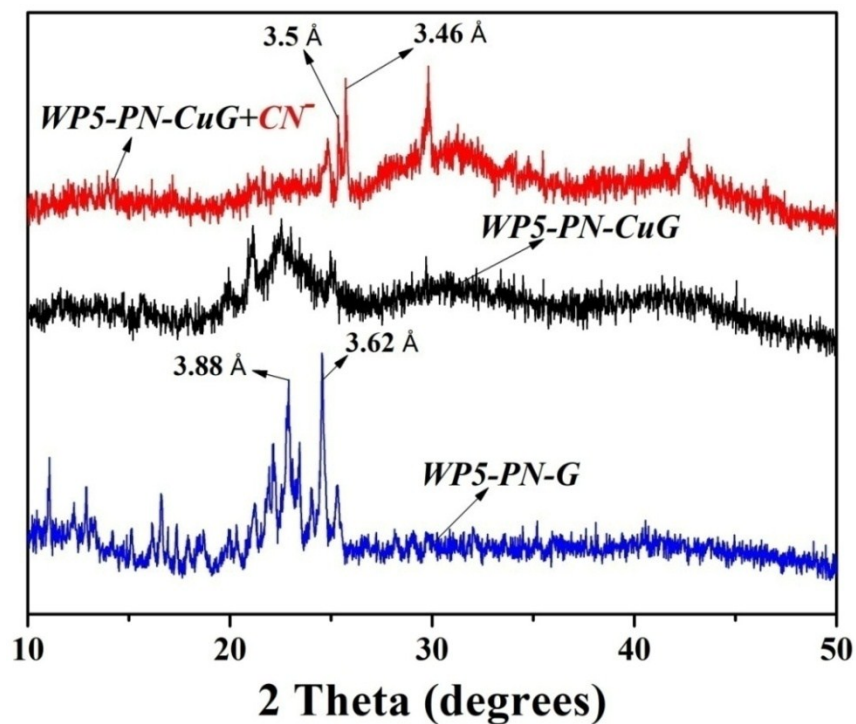

**Fig. S26** XRD diagrams of xerogel of WP5-PN-G, metallogel of WP5-PN-CuG and xerogel of WP5-PN-CuG +CN<sup>-</sup>.

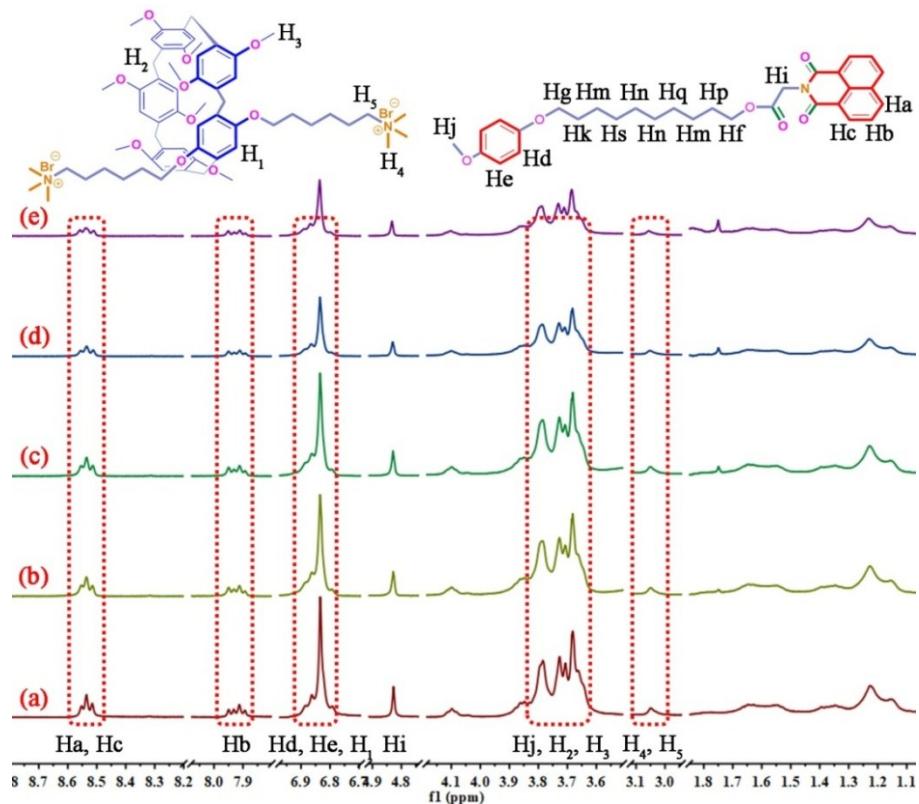

**Fig. S27** Partial <sup>1</sup>H NMR spectra (600 MHz, DMSO-*d*<sub>6</sub>, 298 K) of WP5-

PN and CH<sub>3</sub>COOH at various concentrations: (a) 5.0 mM; (b) 8.0 mM; (c) 10.0 mM; (d) 15.0 mM; (e) 20.0 mM.

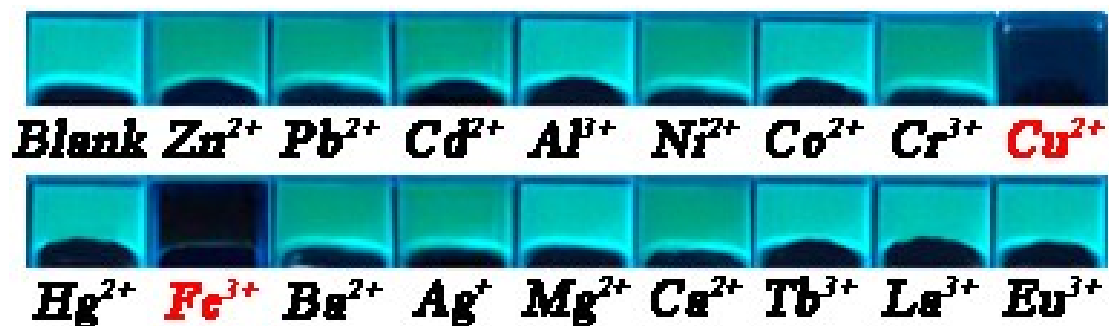

**Fig. S28** Photographs of organogel of **WP5-PN-G** (10.5% w/v) in DMSO-H<sub>2</sub>O (1:1, v/v) system and organogels of **WP5-PN-G** in the presence of various metal ions (Zn<sup>2+</sup>, Pb<sup>2+</sup>, Cd<sup>2+</sup>, Al<sup>3+</sup>, Cr<sup>3+</sup>, Ni<sup>2+</sup>, Co<sup>2+</sup>, Cu<sup>2+</sup>, Hg<sup>2+</sup>, Fe<sup>3+</sup>, Ba<sup>2+</sup>, Ag<sup>+</sup>, Mg<sup>2+</sup>, Ca<sup>2+</sup>, Tb<sup>3+</sup>, La<sup>3+</sup> and Eu<sup>3+</sup>) under UV light.

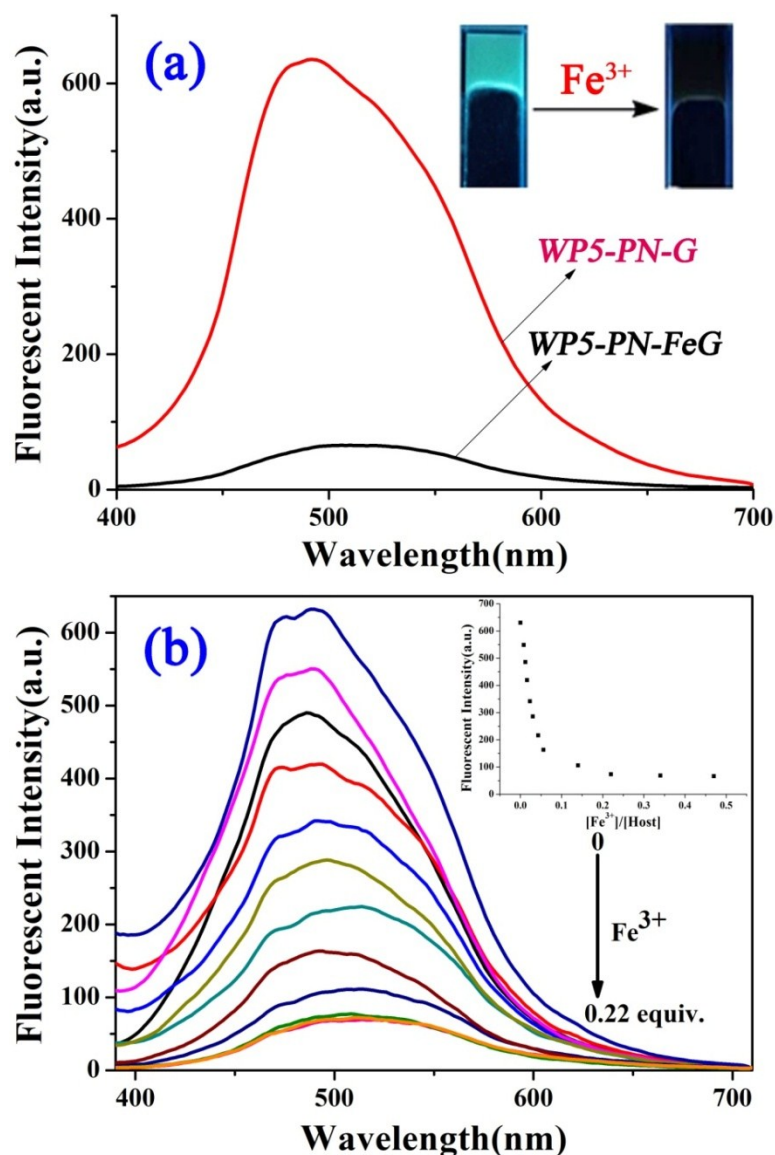

**Fig. S29** Fluorescence spectra of supramolecular gel (a) **WP5-PN-G** and **WP5-PN-FeG** (10.5%, in DMSO-H<sub>2</sub>O (v:v = 1:1) binary solution, **WP5-PN** = 1:1). (b) The fluorescence spectra of **WP5-PN-G** (10.5%, in DMSO-H<sub>2</sub>O (v:v=1:1) binary solution, **WP5-PN** = 1:1) with increasing concentration of Fe<sup>3+</sup> (using 0.1 mol L<sup>-1</sup> Fe<sup>3+</sup> water solution as the Fe<sup>3+</sup> sources),  $\lambda_{\text{ex}} = 365$  nm.

## Determination of the detection limit

We use the  $3\delta$  way to figure out the detection limit. The process of the analysis as follows.

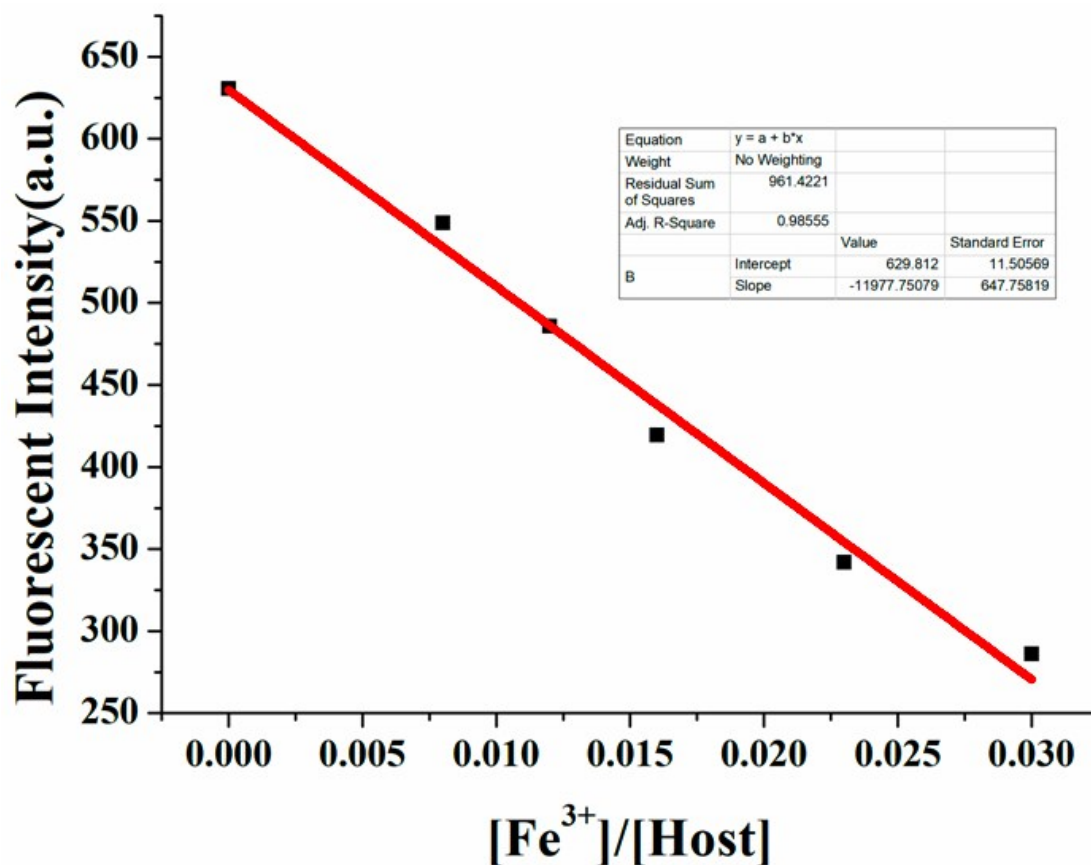

**Fig. S30** Plot of the intensity at 492 nm for a mixture of **WP5-PN-G** and  $\text{Fe}^{3+}$  ( $\lambda_{\text{ex}} = 365 \text{ nm}$ ).

Linear Equation:  $Y = -11977.75079X + 629.812$        $R^2 = 0.98555$

$S = 11977.75 \times 10^6$

$$\delta = \sqrt{\frac{\sum (F_i - F_0)^2}{N-1}} = 2.505324 (N=20)$$

$K = 3$

$\text{LOD} = K \times \delta / S = 6.27 \times 10^{-10} \text{ M}$

$F_i$  is the fluorescence intensity of **WP5-PN-G**;  $F_0$  is the average of the  $F_i$ .

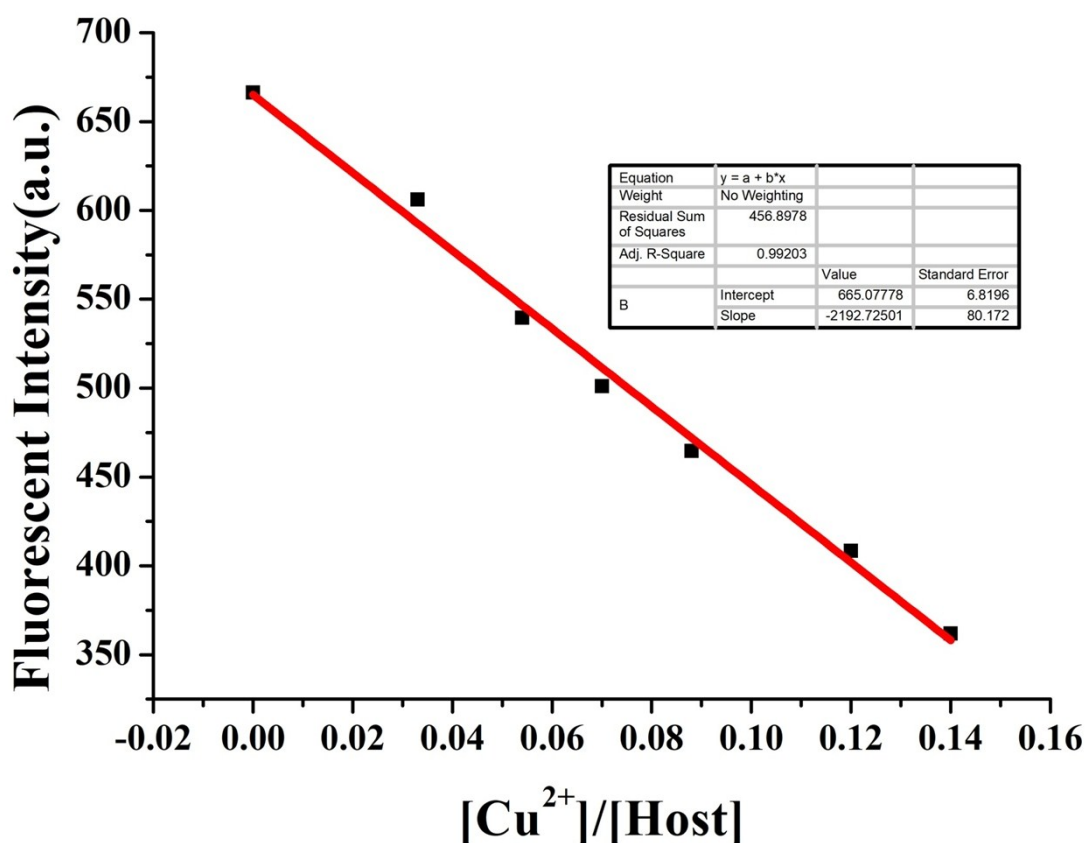

**Fig. S31** Plot of the intensity at 492 nm for a mixture of **WP5-PN-G** and  $\text{Cu}^{2+}$  in DMSO- $\text{H}_2\text{O}$  (1:1, v/v) solution ( $\lambda_{\text{ex}} = 365$  nm).

Linear Equation:  $Y = -2192.72501X + 665.07778$        $R^2 = 0.99203$

$S = 2192.73 \times 10^6$

$$\delta = \sqrt{\frac{\sum(F_i - F_0)^2}{N-1}} = 3.326178 \quad (N=20)$$

$K = 3$

$\text{LOD} = K \times \delta / S = 4.55 \times 10^{-9} \text{ M}$

$F_i$  is the fluorescence intensity of **WP5-PN-G**;  $F_0$  is the average of the  $F_i$ .

**Table S3.** A part of the literatures about the LOD (mol/L) of cations and anions ( $\text{Fe}^{3+}$ ,  $\text{Cu}^{2+}$ ,  $\text{F}^-$  and  $\text{CN}^-$ ) were provided in the followed table.



| Ref.      | for Fe <sup>3+</sup>      | for Cu <sup>2+</sup>      | for F <sup>-</sup>       | for CN <sup>-</sup>       |
|-----------|---------------------------|---------------------------|--------------------------|---------------------------|
| [S1]      | 5.15 × 10 <sup>-7</sup> M | -                         | -                        | -                         |
| [S2]      | -                         | 1.21 × 10 <sup>-6</sup> M | -                        | -                         |
| [S3]      | -                         | -                         | 8 × 10 <sup>-7</sup> M   | -                         |
| [S4]      | -                         | -                         | 1.3 × 10 <sup>-6</sup> M | 7.98 × 10 <sup>-7</sup> M |
| [S5]      | 1 × 10 <sup>-8</sup> M    | -                         | -                        | -                         |
| [S6]      | -                         | 2.0 × 10 <sup>-7</sup> M  | -                        | -                         |
| [S7]      | -                         | -                         | 1.2 × 10 <sup>-7</sup> M | -                         |
| [S8]      | -                         | -                         | -                        | 4 × 10 <sup>-7</sup> M    |
| [S9]      | 2.5 × 10 <sup>-8</sup> M  | -                         | -                        | -                         |
| [S10]     | -                         | 1.0 × 10 <sup>-6</sup> M  | -                        | -                         |
| [S11]     | -                         | -                         | 5.9 × 10 <sup>-7</sup> M | -                         |
| [S12]     | -                         | 2.28 × 10 <sup>-7</sup> M | -                        | 1.33 × 10 <sup>-8</sup> M |
| [S13]     | 2 × 10 <sup>-8</sup> M    | -                         | -                        | -                         |
| [S14]     | -                         | 5.0 × 10 <sup>-8</sup> M  | -                        | -                         |
| [S15]     | -                         | -                         | 2.6 × 10 <sup>-7</sup> M | -                         |
| [S16]     | -                         | -                         | -                        | 5.92 × 10 <sup>-7</sup> M |
| [S17]     | 1.0 × 10 <sup>-7</sup> M  | -                         | -                        | -                         |
| [S18]     | -                         | 1.0 × 10 <sup>-7</sup> M  | -                        | -                         |
| [S19]     | -                         | -                         | 2.0 × 10 <sup>-6</sup> M | -                         |
| [S20]     | -                         | 7 × 10 <sup>-8</sup> M    | -                        | -                         |
| [S21]     | 2.05 × 10 <sup>-8</sup> M | -                         | -                        | -                         |
| This work | 6.27 × 10 <sup>-10</sup>  | 4.55 × 10 <sup>-9</sup>   | 1.0 × 10 <sup>-8</sup>   | 1.0 × 10 <sup>-8</sup>    |

**Table S4** Adsorption percentage of **WP5-PN-G** for Fe<sup>3+</sup> and Cu<sup>2+</sup>.

| Ions             | Initial concentration (M) | Residual concentration(M) | Adsorption percentage % |
|------------------|---------------------------|---------------------------|-------------------------|
| Fe <sup>3+</sup> | 1 × 10 <sup>-4</sup>      | 1.93 × 10 <sup>-6</sup>   | 98.07                   |
| Cu <sup>2+</sup> | 1 × 10 <sup>-4</sup>      | 4.62 × 10 <sup>-6</sup>   | 95.38                   |

Calculation method of adsorption percentage:

$$\text{Adsorption percentage(\%)} = \left(1 - \frac{C_R \times V_R}{C_I \times V_I}\right) \times 100\%$$

(state: C<sub>R</sub> is the residual concentration of Fe<sup>3+</sup>, C<sub>I</sub> is the initial concentration of Fe<sup>3+</sup>, V<sub>R</sub>=V<sub>I</sub>)

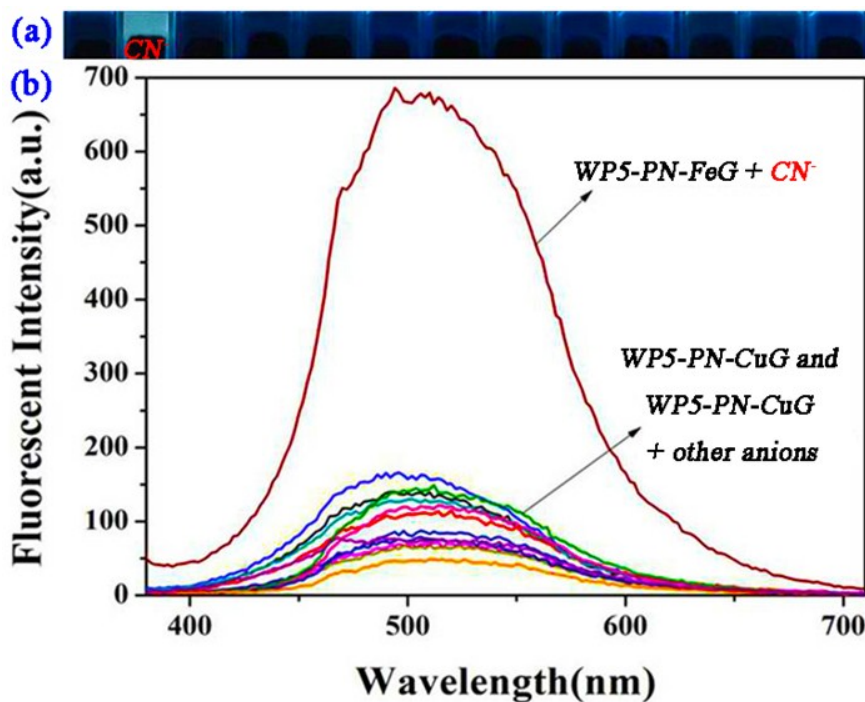

**Fig. S32** (a) Photographs of **WP5-PN-CuG** in the DMSO-H<sub>2</sub>O (1:1, v/v) system (10.5 %, w/v) and **WP5-PN-CuG** in the presence of various anions under UV light. (b) Fluorescence spectra of **WP5-PN-CuG** and **WP5-PN-CuG** (in gelled state) in the presence of various anions, ( $\lambda_{\text{ex}} = 365 \text{ nm}$ ).

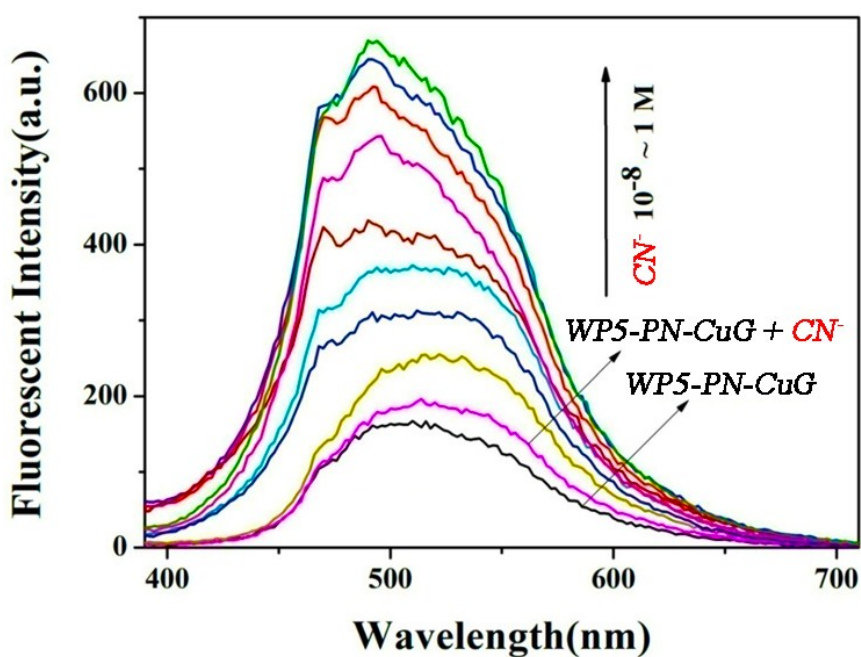

**Fig. S33** Fluorescence spectra of supramolecular metallogel **WP5-PN-**

**CuG** (10.5%, w/v) with increasing concentration of  $\text{CN}^-$  (using 1.0 M NaCN water solution as the  $\text{CN}^-$  source),  $\lambda_{\text{ex}} = 365 \text{ nm}$ .

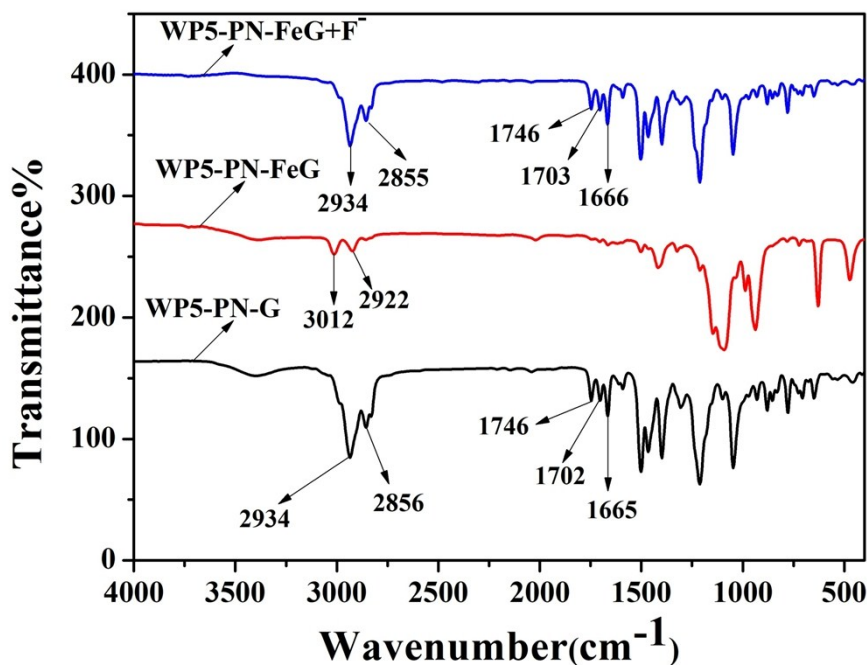

**Fig. S34** FT-IR spectra of xerogel of WP5-PN-G, metallogel WP5-PN-FeG and WP5-PN-FeG +F<sup>-</sup>.

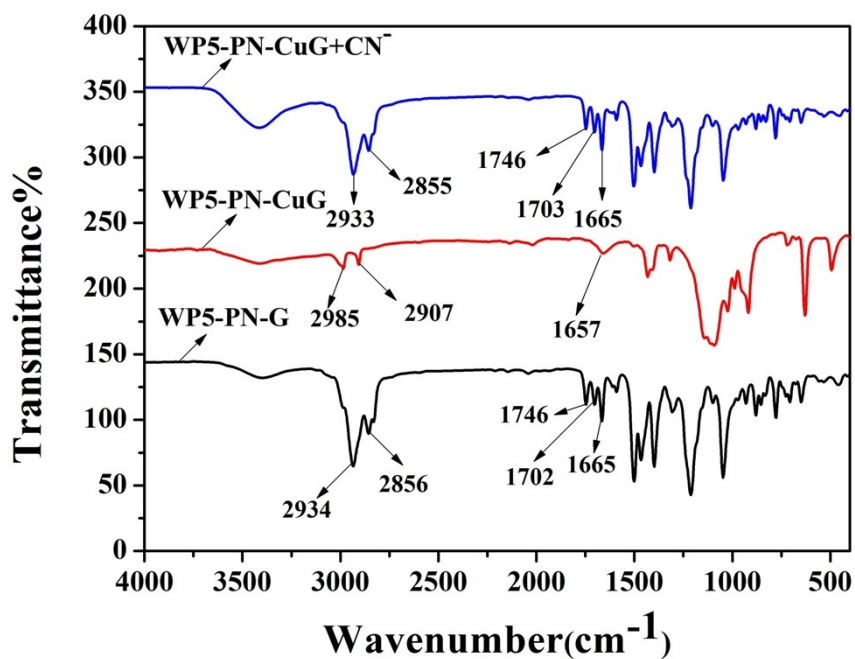

**Fig. S35** FT-IR spectra of xerogel of WP5-PN-G, metallogel WP5-PN-CuG and WP5-PN-CuG +CN<sup>-</sup>.

sujunxia-08-0621 #1 RT: 0.00 AV: 1 NL: 2.59E5  
T: FTMS + p ESI Full ms [300.00-3000.00]

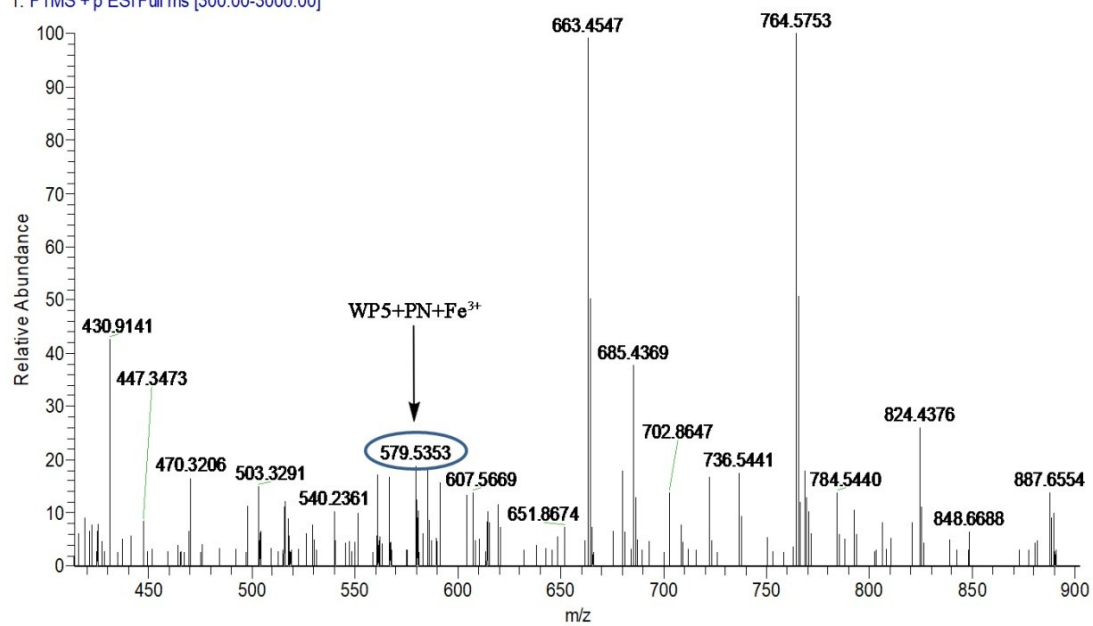

**Fig. S36** ESI-MS spectrum of **WP5-PN-Fe<sup>3+</sup>**.

sujunxia-07-0621 #1 RT: 0.00 AV: 1 NL: 2.77E6  
T: FTMS + p ESI Full ms [300.00-3000.00]

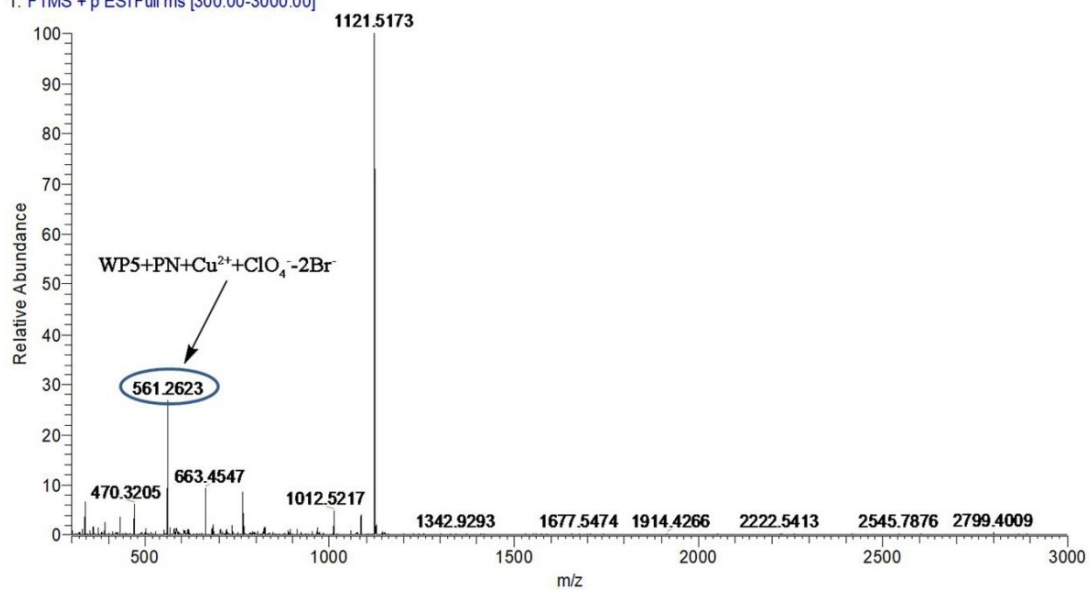

**Fig. S37** ESI-MS spectrum of **WP5-PN-Cu<sup>2+</sup>**.

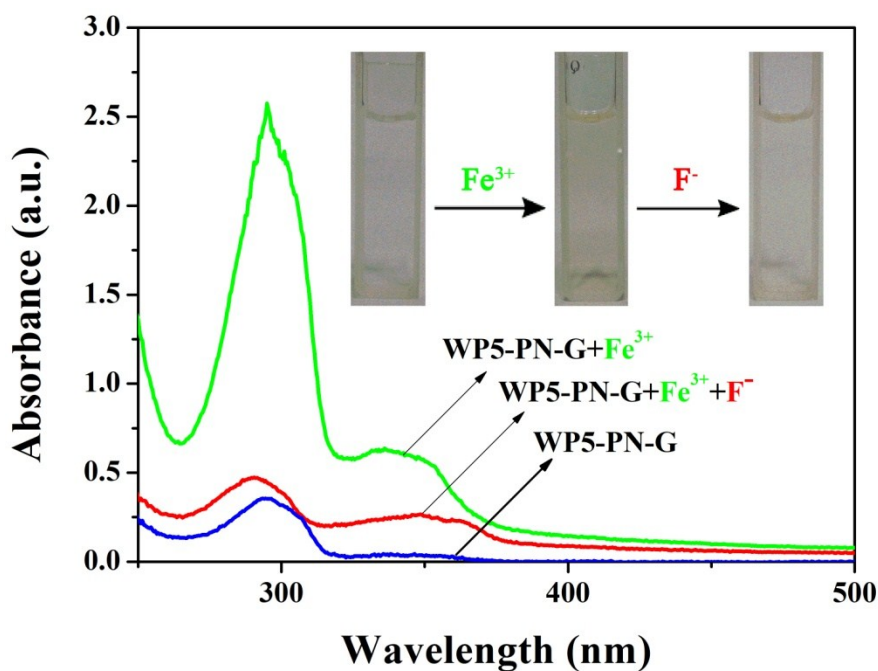

**Fig. S38** Absorbance spectra of **WP5-PN-G** ( $2.0 \times 10^{-5}$  M) in DMSO-H<sub>2</sub>O (1:1, v/v) solution upon the addition of Fe<sup>3+</sup> (5.0 equiv.) and F<sup>-</sup> (20.0 equiv.). Inset: photograph showing the change in color of the solution of **WP5-PN-G** in DMSO-H<sub>2</sub>O (1:1, v/v) solution after addition of Fe<sup>3+</sup> and F<sup>-</sup> at room temperature.

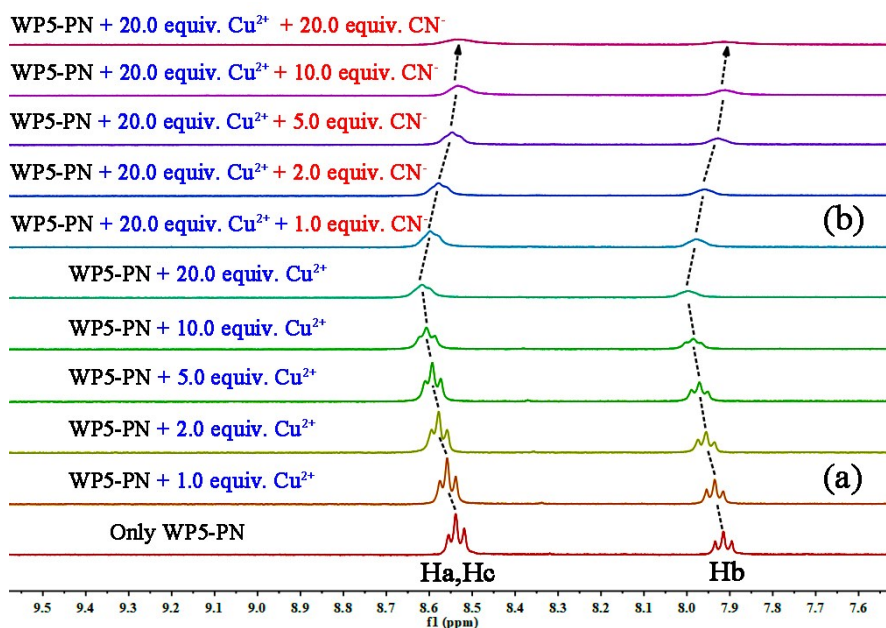

**Fig. S39** Partial  $^1\text{H}$  NMR spectra (600 MHz,  $\text{DMSO-}d_6$ , 298 K) of (a) **WP5-PN** in the presence of varying amounts of  $\text{Cu}^{2+}$  and (b) **WP5-PN** +  $\text{Cu}^{2+}$  in the presence of varying amounts of  $\text{CN}^-$ .

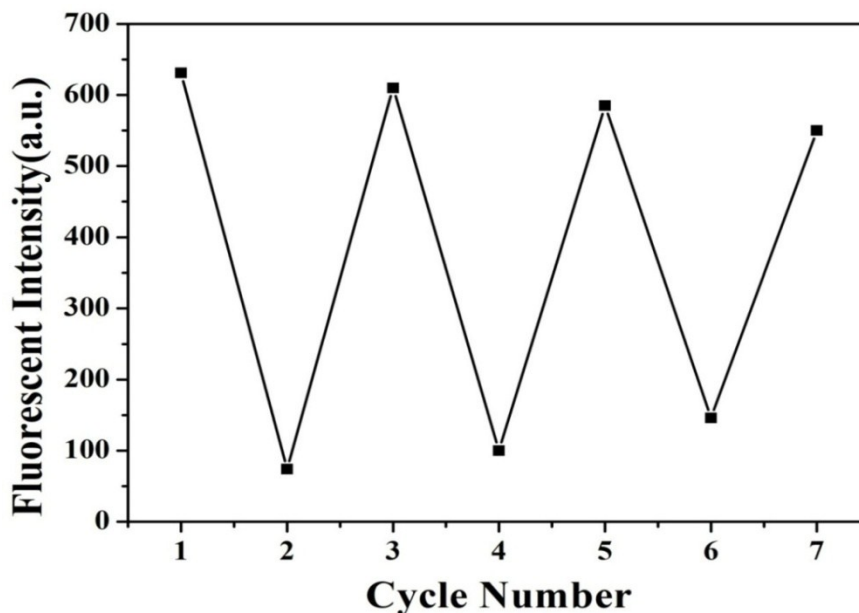

**Fig. S40** Emission spectra showing the reversible evidence between **WP5-PN-G** and  $\text{Fe}^{3+}$  by introduction of  $\text{F}^-$  ( $\lambda_{\text{ex}} = 365 \text{ nm}$ ).

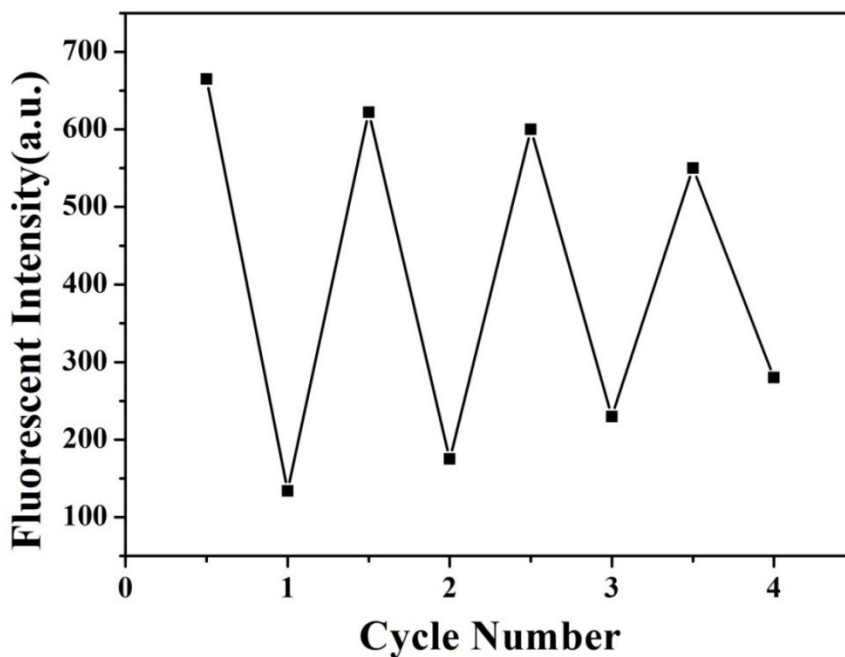

**Fig. S41** Fluorescent ‘‘Off–On–Off’’ cycles of **WP5-PN-G** controlled by the alternating addition of  $\text{Cu}^{2+}$  and  $\text{CN}^-$ , ( $\lambda_{\text{ex}} = 365 \text{ nm}$ ).

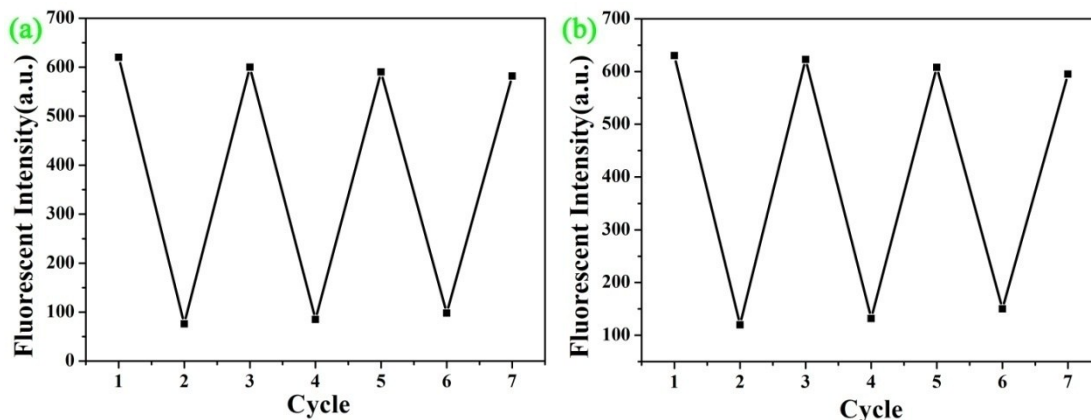

**Fig. S42** (a) Recyclable separation of Fe<sup>3+</sup> ( $\lambda_{\text{ex}} = 365 \text{ nm}$ ), (b) Recyclable separation of Cu<sup>2+</sup> ( $\lambda_{\text{ex}} = 365 \text{ nm}$ ).

**References:**

- [S1] B.-X. Shen and Y. Qian, *J. Mater. Chem. B.*, 2016, **4**, 7549-7559.
- [S2] H. Shao, Y. D. Ding, X. Hong and Y. C. Liu, *Analyst*, 2018, **143**, 409-414 .
- [S3] J. Hu, C. Li, Y. Cui and S. Liu, *Macromol. Rapid Commun.*, 2011, **32**, 610.
- [S4] R. Ali, R. C. Gupta, S. K. Dwivedi and A. Misra, *New J. Chem.*, 2018, **42**, 11746-11754.
- [S5] C. X. Wang, Y. J. Huang, K. L. Jiang, M. G. Humphrey and C. Zhang, *Analyst*, 2016, **141**, 4488-4494.
- [S6] B. N. Ahamed and P. Ghosh, *Dalton Trans.*, 2011, **40**, 6411–6419.
- [S7] X.Cao, W. Lin, Q. Yu and J. Wang, *Org. Lett.*, 2011, **13**, 6098.
- [S8] Y. Shiraishi, M. Nakamura, K. Yamamoto and T. Hirai, *Chem. Commun.*, 2014, **50**, 11583-11586.

- [S9] T. Zhou , X. X. Chen, Q. H. Hua, W. Lei, Q. L. Hao, B. J. Zhou, C. Su and X. F. Bao, *Sensors and Actuators B.*, 2017, **253**, 292–301.
- [S10] H. Seo, M. An, B. Y. Kim, J. H. Choi, A. Helal and H. S. Kim, *Tetrahedron*, 2017, **73**, 4684–4691.
- [S11] J. Ren, Z. Wu, Y. Zhou, Y. Li and Z. Xu, *Dyes Pigm.*, 2011, **91**, 442.
- [S12] L. Y. Qin, L. J. Hou, J. Feng, J. B. Chao, Y. Wang and W. J. Jin, *Anal. Methods.*, 2017, **9**, 259-266.
- [S13] R. H. Guo, S. X. Zhou, Y. C. Li, X. H. Li, L. Z. Fan and N. H. Voelcker, *ACS Appl. Mater. Interfaces*, 2015, **7**, 23958–23966.
- [S14] Y. Li, H. Zhou, S. Yina, H. Jiang, N. Niu, H. Huang, S. A. Shahzad and C. Yu, *Sens. Actuators, B*, 2016, **235**, 33–38.
- [S15] M. Kumar, R. Kumar and V. Bhalla, *Tetrahedron.*, 2009, **65**, 4340.
- [S16] C. S. Liang and S. M. Jiang, *Analyst.*, 2017, **142**, 4825-4833.
- [S17] J. Wang, M. Jiang, L. Yan, R. Peng, M. J. Huangfu, X. X. Guo, Y. Li and P.Y. Wu, *Inorg. Chem.*, 2016, **55**, 12660–12668.
- [S18] L. Huang, J. Cheng, K. Xie, P. Xi, F. Hou, Z. Li, G. Xie, Y. Shi, H. Liu, D. Bai and Z. Zeng, *Dalton Trans.*, 2011, **40**, 10815–10817.
- [S19] W. Huang, H. Lin, Z. Cai and H. Lin, *Talanta.*, 2010, **81**, 967.
- [S20] L. Chen, Z. P. Song, X. T. Liu, L. Q. Guo, M.-J. Li and F. F. Fu, *Analyst*, 2018, **143**, 1609-1614.
- [S21] H. L. Wu, L. Yang, L. F. Chen, F. Xiang and H. Y. Gao, *Anal.*



*Methods*, 2017, **9**, 5935-5942.
